# Supplementary material for: Morphological and genetic variability in cosmopolitan tardigrade species - Paramacrobiotus fairbanksi Schill, Förster, Dandekar &amp; Wolf, 2010
Source: Research Square preprint supplement (doi:10.21203/rs.3.rs-2736709/v2), 2023-07-17
Supplement: Supplementary file 1 [file 4519759462b8a77dc74fe651.xlsx]

## Sheet: instructions
	INSTRUCTIONS and TERMS OF USE
	1	This is a morphometric template for species of the Tardigrada Order Parachela.
	2	The template caluclates the pt ratio and other relative measures only if all measurements required to calculate a ratio are provided (otherwise the ratio cell remains empty, meaning lack of data). The only numbers you need to enter are absolute measurements in micrometres [μm] in the sheet "individuals". If a structure is not measurable leave the cell empty (enetring zeros will mean that the trai…
	3	The "individuals" sheet automatically calculates basic statistics (number of measurements, range, mean and SD). The table with these statistics is placed after the last (30th) specimen. The summary table can be then copied and pasted directly to MS Word.
	4	If measurements are done on the type series, please enter the holotype in the first column (this way holotype data are automatically copied to the summary table at end of the sheet). If measurements are not done on the type series, you may delete the last two columns in the summary table. You may change specimen/slide names as desired.
	5	If a trait listed is not present in the species you are measuring, remove the entire row (highlight the row, right mouse click, choose "delete").
	6	Data from the sheet "individuals" are automatically copied to the four remaining "stats" sheets. Data in those sheets are arranged for statistical analyses in the majority of statistical software.
	7	If you want to see the formulas behind this template, press Ctrl+` (usually just before "1" on the keyboard). To return to the value view, press Ctrl+` again.
	8	This template can be freely used but each published use must be credited as Morphometric data were handled using the Parachela ver. 1.7 template available from the Tardigrada Register, www.tardigrada.net/register (Michalczyk & Kaczmarek 2013). The reference is: Michalczyk, Ł. & Kaczmarek, Ł. (2013) The Tardigrada Register: a comprehensive online data repository for tardigrade taxonomy. Journal of…
	9	Copyright by Łukasz Michalczyk. Enquires and suggestions: LM@tardigrada.net

## Sheet: general info
	Species		Paramacrobiotus fairbanksi
	Population		Mongolia
	Type series		No
	Author		Pushpalata Kayastha
	Date		18.02.2022

## Sheet: animals
SPECIMEN	1 (HOL)		2		3		4		5		6		7		8		9		10		11		12		13		14		15		16		17		18		19		20		21		22		23		24		25
CHARACTER	µm	pt	µm	pt	µm	pt	µm	pt	µm	pt	µm	pt	µm	pt	µm	pt	µm	pt	µm	pt	µm	pt	µm	pt	µm	pt	µm	pt	µm	pt	µm	pt	µm	pt	µm	pt	µm	pt	µm	pt	µm	pt	µm	pt	µm	pt	µm	pt	µm
Body length			762.83	1220.72	715.4	1157.98	767.99	1254.89	848.39	1386.48	864.29	1299.29	801.97	1336.84	857.91	1399.07	552.6	861.553	674.7	998.668	728.65	1265.24	621.5	974.596	625.16	1079.91	585.98	1090.8	631.69	1030.99
Buccopharyngeal tube
Buccal tube length		–	62.49	–	61.78	–	61.2	–	61.19	–	66.52	–	59.99	–	61.32	–	64.14	–	67.56	–	57.59	–	63.77	–	57.89	–	53.72	–	61.27	–		–		–		–		–		–		–		–		–		–
Stylet support insertion point			49.25	78.8126	48.53	78.5529	46.69	76.2908	46.89	76.6302	51.17	76.9242	46.84	78.0797	46.77	76.272	50.13	78.1572			44.47	77.2183	48.39	75.8821	44.66	77.1463	40.67	75.7074	44.98	73.4128
Buccal tube external width			12.89	20.6273	12.8	20.7187	13.12	21.4379	13.75	22.471	15.96	23.9928	15.04	25.0708	12.98	21.1676	12.97	20.2214	18.13	26.8354	13.06	22.6775	12.79	20.0565	12.55	21.679	12.3	22.8965	13.19	21.5277
Buccal tube internal width			10.39	16.6267	9.92	16.057	10.15	16.585	10.13	16.555	11.99	18.0247	10.19	16.9862	10.77	17.5636	9.18	14.3124	14.79	21.8917	10.13	17.5899	9.82	15.3991	9.63	16.635	8.96	16.6791	10.73	17.5126
Ventral lamina length			40.97	65.5625	39.29	63.5966	38.67	63.1863	37.52	61.3172	40.35	60.6584	36	60.01	40.32	65.7534			43.11	63.8099	36.49	63.3617	39.64	62.1609	36.39	62.8606
Placoid lengths
Macroplacoid 1			10.64	17.0267	11.28	18.2583	11	17.9739	11.19	18.2873	13.01	19.558	13.09	21.8203	12.25	19.9772	11.97	18.6623	10.92	16.1634	11.56	20.0729	10.68	16.7477	10.42	17.9997	10.5	19.5458	10.91	17.8064
Macroplacoid 2			9.91	15.8585	9.65	15.6199	9.58	15.6536	9.99	16.3262	10.87	16.341	10.98	18.3031	11.21	18.2811	9.55	14.8893	9.8	14.5056	9.99	17.3468	9.01	14.1289	10.9	18.8288	8.7	16.1951	9.67	15.7826
Macroplacoid 3			13.33	21.3314	12.49	20.2169	13.42	21.9281	13.19	21.5558	14.11	21.2117	15.01	25.0208	12.65	20.6295	11.59	18.0698	13.65	20.2043	12.18	21.1495	11.13	17.4533	12.72	21.9727	10.98	20.4393	11.95	19.5038
Microplacoid			5.85	9.3615	5.14	8.31984	6.27	10.2451	5.76	9.4133	7.05	10.5983	6.54	10.9018	5.59	9.11611	5.7	8.88681	4.61	6.82356	5.19	9.01198	5.14	8.06022	5.5	9.50078	4.66	8.67461	5.54	9.04195
Macroplacoid row			36.21	57.9453	34.96	56.5879	36.86	60.2288	37.27	60.9086	41.36	62.1768	38.93	64.8941	37.99	61.9537	36.34	56.6573	38.587	57.1152	34.78	60.3924	37.76	59.2128	36.4	62.8779	33.2	61.8019	37.08	60.519
Placoid row			50.8	81.293	46.6	75.4289	49.48	80.8497	49.49	80.8792	54.79	82.3662	50.09	83.4972	51.86	84.5727	49.86	77.7362	50.08	74.1267	46.27	80.3438	50.53	79.2379	48.78	84.2633	43.89	81.7014	49.09	80.1208
Claw 1 heights
External primary branch			17.87	28.5966	16.51	26.7239	15.86	25.915	17.1	27.9457	16.58	24.9248	18.06	30.105	17.98	29.3216	17.94	27.9701	17.52	25.9325	15.45	26.8276	15.12	23.7102	16.38	28.295	16.14	30.0447	16.1	26.2771
External secondary branch			15.21	24.3399	14.01	22.6772	11.7	19.1176	13.55	22.1441	13.3	19.994	14.58	24.3041	14.72	24.0052	15.16	23.6358	14.52	21.492	13.55	23.5284	11.92	18.6922	12.91	22.3009	12.41	23.1013	13.25	21.6256
Internal primary branch			15.32	24.5159	15.2	24.6034	14.76	24.1176	17.44	28.5014	15.73	23.647	17.06	28.4381	16.85	27.4788	17.45	27.2061	18.18	26.9094	15.87	27.5569	16.28	25.5292	17.29	29.867	15.99	29.7655	18.12	29.574
Internal secondary branch			11.77	18.835	11.62	18.8087	13.85	22.6307	12.51	20.4445	12.57	18.8966	13.44	22.4037	13.58	22.1461	13.84	21.5778	15.08	22.3209	12.91	22.4171	11.92	18.6922	13.97	24.132	13.11	24.4043	12.84	20.9564
Claw 2 heights
External primary branch			16.35	26.1642	16.96	27.4522	19.38	31.6667	18.84	30.7893	18.39	27.6458	21.04	35.0725	17.37	28.3268	17.08	26.6292	18.7	27.6791	18.76	32.5751	17.62	27.6305	17.23	29.7633	16.21	30.175	18.37	29.982
External secondary branch			15.57	24.916	13.55	21.9327	15.55	25.4085	15.18	24.808	15.75	23.6771	16.92	28.2047	15.21	24.8043	13.92	21.7025	15.1	22.3505	15.19	26.3761	12.55	19.6801	13.81	23.8556	12.67	23.5853	13.36	21.8051
Internal primary branch			13.03	20.8513	13.07	21.1557	17.49	28.5784	19.6	32.0314	16.83	25.3007	17.67	29.4549	15.56	25.3751	17.78	27.7206	18.08	26.7614	13.76	23.893	15.76	24.7138	14.53	25.0993	13.81	25.7074	16.2	26.4403
Internal secondary branch			14.07	22.5156	9.59	15.5228	14.56	23.7908	14.09	23.0266	14.73	22.1437	14.73	24.5541	11.66	19.015	12.62	19.6757	14.99	22.1877	11.87	20.6112	14.21	22.2832	12.06	20.8326	10.77	20.0484	12.66	20.6626
Claw 3 heights
External primary branch			13.64	21.8275	18.19	29.4432	15.16	24.7712	18.48	30.201	18.16	27.3001	16.18	26.9712	18.07	29.4684	15.67	24.4309	19.59	28.9964	18.13	31.4812	17.44	27.3483	17	29.366	16.59	30.8824	18.47	30.1453
External secondary branch			11.68	18.691	15.04	24.3444	11.44	18.6928	14.54	23.7621	16.39	24.6392	11.96	19.9367	13.97	22.7821	12.81	19.9719	15.57	23.0462	14.49	25.1606	13.9	21.7971	10.7	18.4833	11.95	22.245	12.83	20.9401
Internal primary branch			13.64	21.8275	15.25	24.6844	15.19	24.8203	16.95	27.7006	17.38	26.1275	17.67	29.4549	16.96	27.6582	17.52	27.3152	18.02	26.6726	14.86	25.8031	17.06	26.7524	17.85	30.8343	15.08	28.0715	16.97	27.6971
Internal secondary branch			11.21	17.9389	12.65	20.4759	11.06	18.0719	14.9	24.3504	16.42	24.6843	15.08	25.1375	13.12	21.396	12.83	20.0031	14.63	21.6548	11.57	20.0903	13.62	21.358	13.84	23.9074	12.58	23.4177	14.12	23.0455
Claw 4 heights
Anterior primary branch			17.06	27.3004	19.09	30.9	16.14	26.3725	18.44	30.1356	18.43	27.706	20.74	34.5724	17.35	28.2942	18.62	29.0302	21.85	32.3416	18.67	32.4188	19.1	29.9514	20.3	35.0665	15.56	28.965	18.79	30.6675
Anterior secondary branch			12.65	20.2432	15.5	25.089	12.77	20.866	16.14	26.3769	15.83	23.7974	15.6	26.0043	13.13	21.4123	13.55	21.1257	17.09	25.296	14.6	25.3516	10.66	16.7163	14.98	25.8767	13.34	24.8325	14.54	23.731
Posterior primary branch			17.16	27.4604	17.56	28.4234	14.46	23.6275	19.79	32.3419	20.07	30.1714	20.7	34.5058	17.05	27.805	18.81	29.3265	22.78	33.7182	17.2	29.8663	17.95	28.148	18.73	32.3545	17.3	32.204	19.47	31.7774
Posterior secondary branch			14.27	22.8357	11.67	18.8896	11.35	18.5458	17.45	28.5177	15.42	23.181	15.69	26.1544	13.73	22.3907	16.36	25.5067	17.51	25.9177	11.02	19.1353	12.02	18.849	15.1	26.084	14.04	26.1355	13.41	21.8867
Eyes (0 = absent; 1 = present)			0		0		0		0		0		0		0		0		0		0		0		0		0		0
Cuticular pores (0/1)									0				0		0		0		0		0		0		0		0		0
Lunules I with teeth (0/1)			0				0		0		0		0		0		0		0		0		0		0		0		0
Lunules II with teeth (0/1)			0				0		0		0		0		0		0		0		0		0		0		0		0
Lunules III with teeth (0/1)							0		0		0		0		0		0		0		0		0		0		0		0
Lunules IV with teeth (0/1)							0		0		0		0		0		0		0		0		0		0		0		0
Granulation on legs I (0/1)			1		1		1		1		1		1		1		1		1		1		1		1		1		1
Granulation on legs II (0/1)			1		1		1		1		1		1		1		1		1		1		1		1		1		1
Granulation on legs III (0/1)			1		1		1		1		1		1		1		1		1		1		1		1		1		1
Granulation on legs IV (0/1)			1		1		1		1		1		1		1		1		1		1		1		1		1		1
[truncated: 19 more columns]

## Sheet: eggs
CHARACTER	1	2	3	4	5	6	7	8	9	10	11	12	13	14	15	16	17	18	19	20	21	22	23	24	25	26	27	28	29	30		CHARACTER	N	RANGE			MEAN	SD
Egg bare diameter	64.04	64.08	80.2	83.47	74.04	72.25																										Egg bare diameter	6	64.04	–	83.47	73.0133	8.03681
Egg full diameter	87.44	91.08	112.35	103.51	96.36	90.14																										Egg full diameter	6	87.44	–	112.35	96.8133	9.50476
Process height	13.23	14.17	16.71	12.39	14.69	11.04																										Process height	16	11.04	–	16.86	14.1944	1.90937
	13.82	13.86	16.68		16.86	12.37																										Process base width	15	15.01	–	21.67	17.7267	2.25154
	16.5	13.44	16.41		12.9	12.04																										Process base/height ratio	15	1.13615	–	1.37228	1.24151	0.0685168
Process base width	16.58	16.35	21.49		16.69	15.15																										Inter-process distance	12	2.21	–	3.75	3.10583	0.514578
	18.36	17.18	21.67		19.83	15.01																										Number of processes on the egg circumference	5	11	–	15	12.25	1.89297
	18.82	17.15	20.38		16.06	15.18
Process base/height ratio	1.25321	1.15385	1.28606		1.13615	1.37228
	1.32851	1.23954	1.29916		1.17616	1.21342
	1.14061	1.27604	1.24193		1.24496	1.2608
Inter-process distance		3.21	2.78		3.75	3.67
		2.53	3.14		3.41	2.49
		3.7	2.98		2.21	3.4
Number of processes on the egg circumference	15		11		11	12

## Sheet: animals_stats (µm)
Species	Population	Individual	Body length	Buccal tube length	Pharyngeal tube length	Buccopharyngeal tube length	Buccal/pharyngeal tube length ratio	Stylet support insertion point	Buccal tube external width	Buccal tube internal width	Ventral lamina length	Macroplacoid 1	Macroplacoid 2	Macroplacoid 3	Microplacoid	Septulum	Macroplacoid row	Placoid row	Claw 1 external base	Claw 1 external primary branch	Claw 1 external secondary branch	Claw 1 external base/primary branch	Claw 1 internal base	Claw 1 internal primary branch	Claw 1 internal secondary branch	Claw 1 internal base/primary branch	Claw 2 external base	Claw 2 external primary branch	Claw 2 external secondary branch	Claw 2 external base/primary branch	Claw 2 internal base	Claw 2 internal primary branch	Claw 2 internal secondary branch	Claw 2 internal base/primary branch	Claw 3 external base	Claw 3 external primary branch	Claw 3 external secondary branch	Claw 3 external base/primary branch	Claw 3 internal base	Claw 3 internal primary branch	Claw 3 internal secondary branch	Claw 3 internal base/primary branch	Claw 4 anterior base	Claw 4 anterior primary branch	Claw 4 anterior secondary branch	Claw 4 anterior base/primary branch	Claw 4 posterior base	Claw 4 posterior primary branch	Claw 4 posterior secondary branch
Paramacrobiotus fairbanksi	Mongolia	1 (HOL)			#REF!	#REF!	#REF!									#REF!			#REF!			#REF!	#REF!			#REF!	#REF!			#REF!	#REF!			#REF!	#REF!			#REF!	#REF!			#REF!	#REF!			#REF!	#REF!
Paramacrobiotus fairbanksi	Mongolia	2	762.83	62.49	#REF!	#REF!	#REF!	49.25	12.89	10.39	40.97	10.64	9.91	13.33	5.85	#REF!	36.21	50.8	#REF!	17.87	15.21	#REF!	#REF!	15.32	11.77	#REF!	#REF!	16.35	15.57	#REF!	#REF!	13.03	14.07	#REF!	#REF!	13.64	11.68	#REF!	#REF!	13.64	11.21	#REF!	#REF!	17.06	12.65	#REF!	#REF!	17.16	14.27
Paramacrobiotus fairbanksi	Mongolia	3	715.4	61.78	#REF!	#REF!	#REF!	48.53	12.8	9.92	39.29	11.28	9.65	12.49	5.14	#REF!	34.96	46.6	#REF!	16.51	14.01	#REF!	#REF!	15.2	11.62	#REF!	#REF!	16.96	13.55	#REF!	#REF!	13.07	9.59	#REF!	#REF!	18.19	15.04	#REF!	#REF!	15.25	12.65	#REF!	#REF!	19.09	15.5	#REF!	#REF!	17.56	11.67
Paramacrobiotus fairbanksi	Mongolia	4	767.99	61.2	#REF!	#REF!	#REF!	46.69	13.12	10.15	38.67	11	9.58	13.42	6.27	#REF!	36.86	49.48	#REF!	15.86	11.7	#REF!	#REF!	14.76	13.85	#REF!	#REF!	19.38	15.55	#REF!	#REF!	17.49	14.56	#REF!	#REF!	15.16	11.44	#REF!	#REF!	15.19	11.06	#REF!	#REF!	16.14	12.77	#REF!	#REF!	14.46	11.35
Paramacrobiotus fairbanksi	Mongolia	5	848.39	61.19	#REF!	#REF!	#REF!	46.89	13.75	10.13	37.52	11.19	9.99	13.19	5.76	#REF!	37.27	49.49	#REF!	17.1	13.55	#REF!	#REF!	17.44	12.51	#REF!	#REF!	18.84	15.18	#REF!	#REF!	19.6	14.09	#REF!	#REF!	18.48	14.54	#REF!	#REF!	16.95	14.9	#REF!	#REF!	18.44	16.14	#REF!	#REF!	19.79	17.45
Paramacrobiotus fairbanksi	Mongolia	6	864.29	66.52	#REF!	#REF!	#REF!	51.17	15.96	11.99	40.35	13.01	10.87	14.11	7.05	#REF!	41.36	54.79	#REF!	16.58	13.3	#REF!	#REF!	15.73	12.57	#REF!	#REF!	18.39	15.75	#REF!	#REF!	16.83	14.73	#REF!	#REF!	18.16	16.39	#REF!	#REF!	17.38	16.42	#REF!	#REF!	18.43	15.83	#REF!	#REF!	20.07	15.42
Paramacrobiotus fairbanksi	Mongolia	7	801.97	59.99	#REF!	#REF!	#REF!	46.84	15.04	10.19	36	13.09	10.98	15.01	6.54	#REF!	38.93	50.09	#REF!	18.06	14.58	#REF!	#REF!	17.06	13.44	#REF!	#REF!	21.04	16.92	#REF!	#REF!	17.67	14.73	#REF!	#REF!	16.18	11.96	#REF!	#REF!	17.67	15.08	#REF!	#REF!	20.74	15.6	#REF!	#REF!	20.7	15.69
Paramacrobiotus fairbanksi	Mongolia	8	857.91	61.32	#REF!	#REF!	#REF!	46.77	12.98	10.77	40.32	12.25	11.21	12.65	5.59	#REF!	37.99	51.86	#REF!	17.98	14.72	#REF!	#REF!	16.85	13.58	#REF!	#REF!	17.37	15.21	#REF!	#REF!	15.56	11.66	#REF!	#REF!	18.07	13.97	#REF!	#REF!	16.96	13.12	#REF!	#REF!	17.35	13.13	#REF!	#REF!	17.05	13.73
Paramacrobiotus fairbanksi	Mongolia	9	552.6	64.14	#REF!	#REF!	#REF!	50.13	12.97	9.18		11.97	9.55	11.59	5.7	#REF!	36.34	49.86	#REF!	17.94	15.16	#REF!	#REF!	17.45	13.84	#REF!	#REF!	17.08	13.92	#REF!	#REF!	17.78	12.62	#REF!	#REF!	15.67	12.81	#REF!	#REF!	17.52	12.83	#REF!	#REF!	18.62	13.55	#REF!	#REF!	18.81	16.36
Paramacrobiotus fairbanksi	Mongolia	10	674.7	67.56	#REF!	#REF!	#REF!		18.13	14.79	43.11	10.92	9.8	13.65	4.61	#REF!	38.587	50.08	#REF!	17.52	14.52	#REF!	#REF!	18.18	15.08	#REF!	#REF!	18.7	15.1	#REF!	#REF!	18.08	14.99	#REF!	#REF!	19.59	15.57	#REF!	#REF!	18.02	14.63	#REF!	#REF!	21.85	17.09	#REF!	#REF!	22.78	17.51
Paramacrobiotus fairbanksi	Mongolia	11	728.65	57.59	#REF!	#REF!	#REF!	44.47	13.06	10.13	36.49	11.56	9.99	12.18	5.19	#REF!	34.78	46.27	#REF!	15.45	13.55	#REF!	#REF!	15.87	12.91	#REF!	#REF!	18.76	15.19	#REF!	#REF!	13.76	11.87	#REF!	#REF!	18.13	14.49	#REF!	#REF!	14.86	11.57	#REF!	#REF!	18.67	14.6	#REF!	#REF!	17.2	11.02
Paramacrobiotus fairbanksi	Mongolia	12	621.5	63.77	#REF!	#REF!	#REF!	48.39	12.79	9.82	39.64	10.68	9.01	11.13	5.14	#REF!	37.76	50.53	#REF!	15.12	11.92	#REF!	#REF!	16.28	11.92	#REF!	#REF!	17.62	12.55	#REF!	#REF!	15.76	14.21	#REF!	#REF!	17.44	13.9	#REF!	#REF!	17.06	13.62	#REF!	#REF!	19.1	10.66	#REF!	#REF!	17.95	12.02
Paramacrobiotus fairbanksi	Mongolia	13	625.16	57.89	#REF!	#REF!	#REF!	44.66	12.55	9.63	36.39	10.42	10.9	12.72	5.5	#REF!	36.4	48.78	#REF!	16.38	12.91	#REF!	#REF!	17.29	13.97	#REF!	#REF!	17.23	13.81	#REF!	#REF!	14.53	12.06	#REF!	#REF!	17	10.7	#REF!	#REF!	17.85	13.84	#REF!	#REF!	20.3	14.98	#REF!	#REF!	18.73	15.1
Paramacrobiotus fairbanksi	Mongolia	14	585.98	53.72	#REF!	#REF!	#REF!	40.67	12.3	8.96		10.5	8.7	10.98	4.66	#REF!	33.2	43.89	#REF!	16.14	12.41	#REF!	#REF!	15.99	13.11	#REF!	#REF!	16.21	12.67	#REF!	#REF!	13.81	10.77	#REF!	#REF!	16.59	11.95	#REF!	#REF!	15.08	12.58	#REF!	#REF!	15.56	13.34	#REF!	#REF!	17.3	14.04
Paramacrobiotus fairbanksi	Mongolia	15	631.69	61.27	#REF!	#REF!	#REF!	44.98	13.19	10.73		10.91	9.67	11.95	5.54	#REF!	37.08	49.09	#REF!	16.1	13.25	#REF!	#REF!	18.12	12.84	#REF!	#REF!	18.37	13.36	#REF!	#REF!	16.2	12.66	#REF!	#REF!	18.47	12.83	#REF!	#REF!	16.97	14.12	#REF!	#REF!	18.79	14.54	#REF!	#REF!	19.47	13.41
Paramacrobiotus fairbanksi	Mongolia	16			#REF!	#REF!	#REF!									#REF!			#REF!			#REF!	#REF!			#REF!	#REF!			#REF!	#REF!			#REF!	#REF!			#REF!	#REF!			#REF!	#REF!			#REF!	#REF!
Paramacrobiotus fairbanksi	Mongolia	17			#REF!	#REF!	#REF!									#REF!			#REF!			#REF!	#REF!			#REF!	#REF!			#REF!	#REF!			#REF!	#REF!			#REF!	#REF!			#REF!	#REF!			#REF!	#REF!
Paramacrobiotus fairbanksi	Mongolia	18			#REF!	#REF!	#REF!									#REF!			#REF!			#REF!	#REF!			#REF!	#REF!			#REF!	#REF!			#REF!	#REF!			#REF!	#REF!			#REF!	#REF!			#REF!	#REF!
Paramacrobiotus fairbanksi	Mongolia	19			#REF!	#REF!	#REF!									#REF!			#REF!			#REF!	#REF!			#REF!	#REF!			#REF!	#REF!			#REF!	#REF!			#REF!	#REF!			#REF!	#REF!			#REF!	#REF!
Paramacrobiotus fairbanksi	Mongolia	20			#REF!	#REF!	#REF!									#REF!			#REF!			#REF!	#REF!			#REF!	#REF!			#REF!	#REF!			#REF!	#REF!			#REF!	#REF!			#REF!	#REF!			#REF!	#REF!
Paramacrobiotus fairbanksi	Mongolia	21			#REF!	#REF!	#REF!									#REF!			#REF!			#REF!	#REF!			#REF!	#REF!			#REF!	#REF!			#REF!	#REF!			#REF!	#REF!			#REF!	#REF!			#REF!	#REF!
Paramacrobiotus fairbanksi	Mongolia	22			#REF!	#REF!	#REF!									#REF!			#REF!			#REF!	#REF!			#REF!	#REF!			#REF!	#REF!			#REF!	#REF!			#REF!	#REF!			#REF!	#REF!			#REF!	#REF!
Paramacrobiotus fairbanksi	Mongolia	23			#REF!	#REF!	#REF!									#REF!			#REF!			#REF!	#REF!			#REF!	#REF!			#REF!	#REF!			#REF!	#REF!			#REF!	#REF!			#REF!	#REF!			#REF!	#REF!
Paramacrobiotus fairbanksi	Mongolia	24			#REF!	#REF!	#REF!									#REF!			#REF!			#REF!	#REF!			#REF!	#REF!			#REF!	#REF!			#REF!	#REF!			#REF!	#REF!			#REF!	#REF!			#REF!	#REF!
Paramacrobiotus fairbanksi	Mongolia	25			#REF!	#REF!	#REF!									#REF!			#REF!			#REF!	#REF!			#REF!	#REF!			#REF!	#REF!			#REF!	#REF!			#REF!	#REF!			#REF!	#REF!			#REF!	#REF!
Paramacrobiotus fairbanksi	Mongolia	26			#REF!	#REF!	#REF!									#REF!			#REF!			#REF!	#REF!			#REF!	#REF!			#REF!	#REF!			#REF!	#REF!			#REF!	#REF!			#REF!	#REF!			#REF!	#REF!
Paramacrobiotus fairbanksi	Mongolia	27			#REF!	#REF!	#REF!									#REF!			#REF!			#REF!	#REF!			#REF!	#REF!			#REF!	#REF!			#REF!	#REF!			#REF!	#REF!			#REF!	#REF!			#REF!	#REF!
Paramacrobiotus fairbanksi	Mongolia	28			#REF!	#REF!	#REF!									#REF!			#REF!			#REF!	#REF!			#REF!	#REF!			#REF!	#REF!			#REF!	#REF!			#REF!	#REF!			#REF!	#REF!			#REF!	#REF!
Paramacrobiotus fairbanksi	Mongolia	29			#REF!	#REF!	#REF!									#REF!			#REF!			#REF!	#REF!			#REF!	#REF!			#REF!	#REF!			#REF!	#REF!			#REF!	#REF!			#REF!	#REF!			#REF!	#REF!
Paramacrobiotus fairbanksi	Mongolia	30			#REF!	#REF!	#REF!									#REF!			#REF!			#REF!	#REF!			#REF!	#REF!			#REF!	#REF!			#REF!	#REF!			#REF!	#REF!			#REF!	#REF!			#REF!	#REF!
[truncated: 1 more columns]

## Sheet: animals_stats (pt)
Species	Population	Individual	Body length	Pharyngeal tube length	Buccopharyngeal tube length	Stylet support insertion point	Buccal tube external width	Buccal tube internal width	Ventral lamina length	Macroplacoid 1	Macroplacoid 2	Macroplacoid 3	Microplacoid	Septulum	Macroplacoid row	Placoid row	Claw 1 external base	Claw 1 external primary branch	Claw 1 external secondary branch	Claw 1 internal base	Claw 1 internal primary branch	Claw 1 internal secondary branch	Claw 2 external base	Claw 2 external primary branch	Claw 2 external secondary branch	Claw 2 internal base	Claw 2 internal primary branch	Claw 2 internal secondary branch	Claw 3 external base	Claw 3 external primary branch	Claw 3 external secondary branch	Claw 3 internal base	Claw 3 internal primary branch	Claw 3 internal secondary branch	Claw 4 anterior base	Claw 4 anterior primary branch	Claw 4 anterior secondary branch	Claw 4 posterior base	Claw 4 posterior primary branch	Claw 4 posterior secondary branch
Paramacrobiotus fairbanksi	Mongolia	1 (HOL)		#REF!	#REF!									#REF!			#REF!			#REF!			#REF!			#REF!			#REF!			#REF!			#REF!			#REF!
Paramacrobiotus fairbanksi	Mongolia	2	1220.72	#REF!	#REF!	78.8126	20.6273	16.6267	65.5625	17.0267	15.8585	21.3314	9.3615	#REF!	57.9453	81.293	#REF!	28.5966	24.3399	#REF!	24.5159	18.835	#REF!	26.1642	24.916	#REF!	20.8513	22.5156	#REF!	21.8275	18.691	#REF!	21.8275	17.9389	#REF!	27.3004	20.2432	#REF!	27.4604	22.8357
Paramacrobiotus fairbanksi	Mongolia	3	1157.98	#REF!	#REF!	78.5529	20.7187	16.057	63.5966	18.2583	15.6199	20.2169	8.31984	#REF!	56.5879	75.4289	#REF!	26.7239	22.6772	#REF!	24.6034	18.8087	#REF!	27.4522	21.9327	#REF!	21.1557	15.5228	#REF!	29.4432	24.3444	#REF!	24.6844	20.4759	#REF!	30.9	25.089	#REF!	28.4234	18.8896
Paramacrobiotus fairbanksi	Mongolia	4	1254.89	#REF!	#REF!	76.2908	21.4379	16.585	63.1863	17.9739	15.6536	21.9281	10.2451	#REF!	60.2288	80.8497	#REF!	25.915	19.1176	#REF!	24.1176	22.6307	#REF!	31.6667	25.4085	#REF!	28.5784	23.7908	#REF!	24.7712	18.6928	#REF!	24.8203	18.0719	#REF!	26.3725	20.866	#REF!	23.6275	18.5458
Paramacrobiotus fairbanksi	Mongolia	5	1386.48	#REF!	#REF!	76.6302	22.471	16.555	61.3172	18.2873	16.3262	21.5558	9.4133	#REF!	60.9086	80.8792	#REF!	27.9457	22.1441	#REF!	28.5014	20.4445	#REF!	30.7893	24.808	#REF!	32.0314	23.0266	#REF!	30.201	23.7621	#REF!	27.7006	24.3504	#REF!	30.1356	26.3769	#REF!	32.3419	28.5177
Paramacrobiotus fairbanksi	Mongolia	6	1299.29	#REF!	#REF!	76.9242	23.9928	18.0247	60.6584	19.558	16.341	21.2117	10.5983	#REF!	62.1768	82.3662	#REF!	24.9248	19.994	#REF!	23.647	18.8966	#REF!	27.6458	23.6771	#REF!	25.3007	22.1437	#REF!	27.3001	24.6392	#REF!	26.1275	24.6843	#REF!	27.706	23.7974	#REF!	30.1714	23.181
Paramacrobiotus fairbanksi	Mongolia	7	1336.84	#REF!	#REF!	78.0797	25.0708	16.9862	60.01	21.8203	18.3031	25.0208	10.9018	#REF!	64.8941	83.4972	#REF!	30.105	24.3041	#REF!	28.4381	22.4037	#REF!	35.0725	28.2047	#REF!	29.4549	24.5541	#REF!	26.9712	19.9367	#REF!	29.4549	25.1375	#REF!	34.5724	26.0043	#REF!	34.5058	26.1544
Paramacrobiotus fairbanksi	Mongolia	8	1399.07	#REF!	#REF!	76.272	21.1676	17.5636	65.7534	19.9772	18.2811	20.6295	9.11611	#REF!	61.9537	84.5727	#REF!	29.3216	24.0052	#REF!	27.4788	22.1461	#REF!	28.3268	24.8043	#REF!	25.3751	19.015	#REF!	29.4684	22.7821	#REF!	27.6582	21.396	#REF!	28.2942	21.4123	#REF!	27.805	22.3907
Paramacrobiotus fairbanksi	Mongolia	9	861.553	#REF!	#REF!	78.1572	20.2214	14.3124		18.6623	14.8893	18.0698	8.88681	#REF!	56.6573	77.7362	#REF!	27.9701	23.6358	#REF!	27.2061	21.5778	#REF!	26.6292	21.7025	#REF!	27.7206	19.6757	#REF!	24.4309	19.9719	#REF!	27.3152	20.0031	#REF!	29.0302	21.1257	#REF!	29.3265	25.5067
Paramacrobiotus fairbanksi	Mongolia	10	998.668	#REF!	#REF!		26.8354	21.8917	63.8099	16.1634	14.5056	20.2043	6.82356	#REF!	57.1152	74.1267	#REF!	25.9325	21.492	#REF!	26.9094	22.3209	#REF!	27.6791	22.3505	#REF!	26.7614	22.1877	#REF!	28.9964	23.0462	#REF!	26.6726	21.6548	#REF!	32.3416	25.296	#REF!	33.7182	25.9177
Paramacrobiotus fairbanksi	Mongolia	11	1265.24	#REF!	#REF!	77.2183	22.6775	17.5899	63.3617	20.0729	17.3468	21.1495	9.01198	#REF!	60.3924	80.3438	#REF!	26.8276	23.5284	#REF!	27.5569	22.4171	#REF!	32.5751	26.3761	#REF!	23.893	20.6112	#REF!	31.4812	25.1606	#REF!	25.8031	20.0903	#REF!	32.4188	25.3516	#REF!	29.8663	19.1353
Paramacrobiotus fairbanksi	Mongolia	12	974.596	#REF!	#REF!	75.8821	20.0565	15.3991	62.1609	16.7477	14.1289	17.4533	8.06022	#REF!	59.2128	79.2379	#REF!	23.7102	18.6922	#REF!	25.5292	18.6922	#REF!	27.6305	19.6801	#REF!	24.7138	22.2832	#REF!	27.3483	21.7971	#REF!	26.7524	21.358	#REF!	29.9514	16.7163	#REF!	28.148	18.849
Paramacrobiotus fairbanksi	Mongolia	13	1079.91	#REF!	#REF!	77.1463	21.679	16.635	62.8606	17.9997	18.8288	21.9727	9.50078	#REF!	62.8779	84.2633	#REF!	28.295	22.3009	#REF!	29.867	24.132	#REF!	29.7633	23.8556	#REF!	25.0993	20.8326	#REF!	29.366	18.4833	#REF!	30.8343	23.9074	#REF!	35.0665	25.8767	#REF!	32.3545	26.084
Paramacrobiotus fairbanksi	Mongolia	14	1090.8	#REF!	#REF!	75.7074	22.8965	16.6791		19.5458	16.1951	20.4393	8.67461	#REF!	61.8019	81.7014	#REF!	30.0447	23.1013	#REF!	29.7655	24.4043	#REF!	30.175	23.5853	#REF!	25.7074	20.0484	#REF!	30.8824	22.245	#REF!	28.0715	23.4177	#REF!	28.965	24.8325	#REF!	32.204	26.1355
Paramacrobiotus fairbanksi	Mongolia	15	1030.99	#REF!	#REF!	73.4128	21.5277	17.5126		17.8064	15.7826	19.5038	9.04195	#REF!	60.519	80.1208	#REF!	26.2771	21.6256	#REF!	29.574	20.9564	#REF!	29.982	21.8051	#REF!	26.4403	20.6626	#REF!	30.1453	20.9401	#REF!	27.6971	23.0455	#REF!	30.6675	23.731	#REF!	31.7774	21.8867
Paramacrobiotus fairbanksi	Mongolia	16		#REF!	#REF!									#REF!			#REF!			#REF!			#REF!			#REF!			#REF!			#REF!			#REF!			#REF!
Paramacrobiotus fairbanksi	Mongolia	17		#REF!	#REF!									#REF!			#REF!			#REF!			#REF!			#REF!			#REF!			#REF!			#REF!			#REF!
Paramacrobiotus fairbanksi	Mongolia	18		#REF!	#REF!									#REF!			#REF!			#REF!			#REF!			#REF!			#REF!			#REF!			#REF!			#REF!
Paramacrobiotus fairbanksi	Mongolia	19		#REF!	#REF!									#REF!			#REF!			#REF!			#REF!			#REF!			#REF!			#REF!			#REF!			#REF!
Paramacrobiotus fairbanksi	Mongolia	20		#REF!	#REF!									#REF!			#REF!			#REF!			#REF!			#REF!			#REF!			#REF!			#REF!			#REF!
Paramacrobiotus fairbanksi	Mongolia	21		#REF!	#REF!									#REF!			#REF!			#REF!			#REF!			#REF!			#REF!			#REF!			#REF!			#REF!
Paramacrobiotus fairbanksi	Mongolia	22		#REF!	#REF!									#REF!			#REF!			#REF!			#REF!			#REF!			#REF!			#REF!			#REF!			#REF!
Paramacrobiotus fairbanksi	Mongolia	23		#REF!	#REF!									#REF!			#REF!			#REF!			#REF!			#REF!			#REF!			#REF!			#REF!			#REF!
Paramacrobiotus fairbanksi	Mongolia	24		#REF!	#REF!									#REF!			#REF!			#REF!			#REF!			#REF!			#REF!			#REF!			#REF!			#REF!
Paramacrobiotus fairbanksi	Mongolia	25		#REF!	#REF!									#REF!			#REF!			#REF!			#REF!			#REF!			#REF!			#REF!			#REF!			#REF!
Paramacrobiotus fairbanksi	Mongolia	26		#REF!	#REF!									#REF!			#REF!			#REF!			#REF!			#REF!			#REF!			#REF!			#REF!			#REF!
Paramacrobiotus fairbanksi	Mongolia	27		#REF!	#REF!									#REF!			#REF!			#REF!			#REF!			#REF!			#REF!			#REF!			#REF!			#REF!
Paramacrobiotus fairbanksi	Mongolia	28		#REF!	#REF!									#REF!			#REF!			#REF!			#REF!			#REF!			#REF!			#REF!			#REF!			#REF!
Paramacrobiotus fairbanksi	Mongolia	29		#REF!	#REF!									#REF!			#REF!			#REF!			#REF!			#REF!			#REF!			#REF!			#REF!			#REF!
Paramacrobiotus fairbanksi	Mongolia	30		#REF!	#REF!									#REF!			#REF!			#REF!			#REF!			#REF!			#REF!			#REF!			#REF!			#REF!

## Sheet: eggs_stats (µm)
Species	Population	egg	Egg bare diameter	Egg full diameter	Process height	Process base width	Process base/height ratio	Terminal disc width	Inter-process distance	Number of processes on the egg circumference
Paramacrobiotus fairbanksi	Mongolia	1	64.04	87.44	14.5167	17.92	1.24078	#REF!		15
Paramacrobiotus fairbanksi	Mongolia	2	64.08	91.08	13.8233	16.8933	1.22314	#REF!	3.14667
Paramacrobiotus fairbanksi	Mongolia	3	80.2	112.35	16.6	21.18	1.27571	#REF!	2.96667	11
Paramacrobiotus fairbanksi	Mongolia	4	83.47	103.51	12.39			#REF!
Paramacrobiotus fairbanksi	Mongolia	5	74.04	96.36	14.8167	17.5267	1.18575	#REF!	3.12333	11
Paramacrobiotus fairbanksi	Mongolia	6	72.25	90.14	11.8167	15.1133	1.28217	#REF!	3.18667	12
Paramacrobiotus fairbanksi	Mongolia	7						#REF!
Paramacrobiotus fairbanksi	Mongolia	8						#REF!
Paramacrobiotus fairbanksi	Mongolia	9						#REF!
Paramacrobiotus fairbanksi	Mongolia	10						#REF!
Paramacrobiotus fairbanksi	Mongolia	11						#REF!
Paramacrobiotus fairbanksi	Mongolia	12						#REF!
Paramacrobiotus fairbanksi	Mongolia	13						#REF!
Paramacrobiotus fairbanksi	Mongolia	14						#REF!
Paramacrobiotus fairbanksi	Mongolia	15						#REF!
Paramacrobiotus fairbanksi	Mongolia	16						#REF!
Paramacrobiotus fairbanksi	Mongolia	17						#REF!
Paramacrobiotus fairbanksi	Mongolia	18						#REF!
Paramacrobiotus fairbanksi	Mongolia	19						#REF!
Paramacrobiotus fairbanksi	Mongolia	20						#REF!
Paramacrobiotus fairbanksi	Mongolia	21						#REF!
Paramacrobiotus fairbanksi	Mongolia	22						#REF!
Paramacrobiotus fairbanksi	Mongolia	23						#REF!
Paramacrobiotus fairbanksi	Mongolia	24						#REF!
Paramacrobiotus fairbanksi	Mongolia	25						#REF!
Paramacrobiotus fairbanksi	Mongolia	26						#REF!
Paramacrobiotus fairbanksi	Mongolia	27						#REF!
Paramacrobiotus fairbanksi	Mongolia	28						#REF!
Paramacrobiotus fairbanksi	Mongolia	29						#REF!
Paramacrobiotus fairbanksi	Mongolia	30						#REF!
