# Supplementary material for: Morphological and genetic variability in cosmopolitan tardigrade species - Paramacrobiotus fairbanksi Schill, Förster, Dandekar &amp; Wolf, 2010
Source: Research Square preprint supplement (doi:10.21203/rs.3.rs-2736709/v2), 2023-07-17
Supplement: Supplementary file 2 [file 8467159e5eda165e682caf88.xlsx]

## Sheet: instructions
	INSTRUCTIONS and TERMS OF USE
	1	This is a morphometric template for species of the Tardigrada Order Parachela.
	2	The template caluclates the pt ratio and other relative measures only if all measurements required to calculate a ratio are provided (otherwise the ratio cell remains empty, meaning lack of data). The only numbers you need to enter are absolute measurements in micrometres [μm] in the sheet "individuals". If a structure is not measurable leave the cell empty (enetring zeros will mean that the trai…
	3	The "individuals" sheet automatically calculates basic statistics (number of measurements, range, mean and SD). The table with these statistics is placed after the last (30th) specimen. The summary table can be then copied and pasted directly to MS Word.
	4	If measurements are done on the type series, please enter the holotype in the first column (this way holotype data are automatically copied to the summary table at end of the sheet). If measurements are not done on the type series, you may delete the last two columns in the summary table. You may change specimen/slide names as desired.
	5	If a trait listed is not present in the species you are measuring, remove the entire row (highlight the row, right mouse click, choose "delete").
	6	Data from the sheet "individuals" are automatically copied to the four remaining "stats" sheets. Data in those sheets are arranged for statistical analyses in the majority of statistical software.
	7	If you want to see the formulas behind this template, press Ctrl+` (usually just before "1" on the keyboard). To return to the value view, press Ctrl+` again.
	8	This template can be freely used but each published use must be credited as Morphometric data were handled using the Parachela ver. 1.7 template available from the Tardigrada Register, www.tardigrada.net/register (Michalczyk & Kaczmarek 2013). The reference is: Michalczyk, Ł. & Kaczmarek, Ł. (2013) The Tardigrada Register: a comprehensive online data repository for tardigrade taxonomy. Journal of…
	9	Copyright by Łukasz Michalczyk. Enquires and suggestions: LM@tardigrada.net

## Sheet: general info
	Species		Paramacrobiotus fairbanksi
	Population		Canada
	Type series		No
	Author		Pushpalata Kayastha
	Date		26.02.2021

## Sheet: animals
SPECIMEN	1 (HOL)		2		3		4		5		6		7		8		9		10		11		12		13		14		15		16		17		18		19		20		21		22		23		24		25
CHARACTER	µm	pt	µm	pt	µm	pt	µm	pt	µm	pt	µm	pt	µm	pt	µm	pt	µm	pt	µm	pt	µm	pt	µm	pt	µm	pt	µm	pt	µm	pt	µm	pt	µm	pt	µm	pt	µm	pt	µm	pt	µm	pt	µm	pt	µm	pt	µm	pt	µm
Body length	432.8	982.966	770.3	1208.88	772.07	1226.09	734.19	1190.13	642.24	1106.74	437.18	749.366			504.67	1244.56	499.26	1016.62	494.9	976.134	636.82	1103.87	667.45	1141.33	506.08	949.672	303.29	898.105	513.39	1057.23	649.14	1108.69	587.46	1099.08	428.41	1008.5
Buccopharyngeal tube
Buccal tube length	44.03	–	63.72	–	62.97	–	61.69	–	58.03	–	58.34	–		–	40.55	–	49.11	–	50.7	–	57.69	–	58.48	–	53.29	–	33.77	–	48.56	–	58.55	–	53.45	–	42.48	–		–		–		–		–		–		–
Stylet support insertion point	33.88	76.9475	50.95	79.9592	48.98	77.7831	47.82	77.5166	46.35	79.8725	46.22	79.2252			31.93	78.7423	38.52	78.4362	39.87	78.6391	45.6	79.0432	44.06	75.342	42.15	79.0955	26.33	77.9686	38.08	78.4185	44.79	76.4987	42.25	79.0458	33.45	78.7429
Buccal tube external width	9.25	21.0084	13.66	21.4375	12.98	20.613	13.09	21.219	13.66	23.5395	11.37	19.4892			6.23	15.3637	10.02	20.4032	12.01	23.6884	12.42	21.5289	12.58	21.5116	11.72	21.9929	7.15	21.1726	10.79	22.2199	13.31	22.7327	12.71	23.7792	8.95	21.0687
Buccal tube internal width	7.12	16.1708	11.36	17.828	10.12	16.0711	10.28	16.664	9.68	16.681	8.93	15.3068			4.48	11.0481	6.62	13.4799	8.88	17.5148	8.39	14.5432	9.31	15.92	7.92	14.8621	4.88	14.4507	7.48	15.4036	8.49	14.5004	9.66	18.073	5.99	14.1008
Ventral lamina length	26.29	59.7093	38.28	60.0753	37.14	58.9805	36.46	59.102	35.61	61.3648	36.84	63.1471			24.54	60.5179	27.89	56.7909	29.38	57.9487	37.15	64.3959	37.81	64.6546	32.96	61.8503			28.34	58.3608	33.01	56.3792			26.57	62.5471
Placoid lengths
Macroplacoid 1	7.25	16.466	10.3	16.1645	11.11	17.6433	10.51	17.0368	10.7	18.4387	9.8	16.7981			5.06	12.4784	7.92	16.1271	8.61	16.9822	9.53	16.5193	11.65	19.9213	9.52	17.8645	4.66	13.7992	7.28	14.9918	11.31	19.3168	9.2	17.2123	7	16.4783
Macroplacoid 2	6.84	15.5349	10.17	15.9605	9.14	14.5148	10.36	16.7936	9.73	16.7672	8.37	14.3469			4.56	11.2454	7.16	14.5795	7.33	14.4576	8.64	14.9766	9.39	16.0568	6.99	13.1169	3.86	11.4303	6.64	13.6738	9.04	15.4398	8.61	16.1085	5.68	13.371
Macroplacoid 3	7.63	17.3291	10.52	16.5097	11.34	18.0086	11.77	19.0793	11.2	19.3004	9.9	16.9695			7	17.2626	9.56	19.4665	9.43	18.5996	12.08	20.9395	11.05	18.8953	10.35	19.422	5.02	14.8653	7.63	15.7125	11.82	20.1879	10.49	19.6258	7.47	17.5847
Microplacoid	3.54	8.03997	4.33	6.79535	3.89	6.17754	5.15	8.34819	4.12	7.09978	4.43	7.59342			3.13	7.71887	3.77	7.67664	3.66	7.21893	4.29	7.4363	4.17	7.13064	5.17	9.70163	2.96	8.76518	3.69	7.59885	4.59	7.83945	4.72	8.83068	3.64	8.56874
Macroplacoid row	23.35	53.032	36.04	56.5599	34.81	55.2803	35.4	57.3837	34.54	59.5209	30.24	51.8341			21.54	53.1196	26.77	54.5103	28.77	56.7456	34.11	59.1264	34.09	58.2934	29.59	55.5264			26.34	54.2422	33.66	57.4893	30.94	57.8859	22.95	54.0254
Placoid row	30.15	68.476	45.1	70.7784	46.83	74.3687	45.85	74.3232	42.66	73.5137	40.24	68.975			27.9	68.8039	33.88	68.988	36.06	71.1243	40.89	70.8788	41.7	71.3064	39.19	73.541	23.56	69.7661	34.21	70.4489	44.39	75.8155	40.14	75.0982	29.84	70.2448
Claw 1 heights
External primary branch	12.92	29.3436	16.57	26.0044	16.57	26.3141	16.69	27.0546			15.9	27.254			8.88	21.8989	12.25	24.944	15.26	30.0986	16.35	28.3411	16.63	28.4371	15.68	29.4239	8.17	24.1931	14.93	30.7455	17.89	30.5551	14.08	26.3424	11.98	28.2015
External secondary branch	9.12	20.7132	13.4	21.0295	12.91	20.5018	12.6	20.4247			12.02	20.6034			7.81	19.2602	9.5	19.3443	10.26	20.2367	12.87	22.3089	11.59	19.8187	10.54	19.7786	5.46	16.1682	10.54	21.7051	14.77	25.2263	11.27	21.0851	9.35	22.0104
Internal primary branch	10.93	24.824	13.95	21.8927	15.12	24.0114	14.35	23.2615			16.07	27.5454			8.41	20.7398	11.33	23.0707	14.69	28.9744	15	26.001	15.73	26.8981	14.29	26.8155	8.48	25.111	12.31	25.3501	16.14	27.5662	13.53	25.3134	10.71	25.2119
Internal secondary branch	8.66	19.6684	11.41	17.9065	12.64	20.0731	11.9	19.29			11.92	20.432			6.94	17.1147	9.04	18.4077	12.21	24.0828	13.89	24.077	12.45	21.2893	11.11	20.8482	7.26	21.4984	10.96	22.57	11.99	20.4782	12.45	23.2928	9.02	21.2335
Claw 2 heights
External primary branch	13.16	29.8887	16.85	26.4438	18.05	28.6644	17.87	28.9674	17.13	29.5192	14.29	24.4943			9.21	22.7127	11.41	23.2336	13.66	26.9428	17.4	30.1612	17.54	29.9932	14.43	27.0783	9.98	29.5529	11.13	22.9201	17.72	30.2647	15.72	29.4107	12.35	29.0725
External secondary branch	10.72	24.347	15.04	23.6033	14.78	23.4715	13.52	21.916	13.91	23.9704	12.54	21.4947			7.16	17.6572			12.54	24.7337	13.66	23.6783	15.45	26.4193	10.66	20.0038	7.28	21.5576	9.38	19.3163	13.39	22.8693	11.29	21.1225	9.49	22.3399
Internal primary branch	11.82	26.8453	14.2	22.285	15.07	23.932	15.38	24.9311	14.57	25.1077	16.18	27.734			8.47	20.8878	13.08	26.6341	13.06	25.7594	15.01	26.0184	13.76	23.5294	14.38	26.9844	7.97	23.6008	12.6	25.9473	15.27	26.0803	14.1	26.3798	11.78	27.7307
Internal secondary branch	9.23	20.963	13.53	21.2335	13.13	20.8512	13.38	21.6891	11.55	19.9035	12.47	21.3747			7.81	19.2602	9.61	19.5683	11.55	22.7811	12.45	21.5809	11.13	19.0321	12.32	23.1188	6.86	20.3139	9.69	19.9547	13.81	23.5867	11.47	21.4593	9.31	21.9162
Claw 3 heights
External primary branch	13.78	31.2968	17.93	28.1387	15.86	25.1866	17.71	28.7081	18.28	31.5009	17.24	29.5509			9.59	23.6498	10.04	20.4439	16.18	31.9132	14.57	25.2557	18.56	31.7373	15.1	28.3355	9.04	26.7693	15.5	31.9193	17.74	30.2989	15.2	28.4378	11.57	27.2363
External secondary branch	9.32	21.1674	14.08	22.0967	13.02	20.6765	14.38	23.3101	14.27	24.5907	12.98	22.2489			7.08	17.4599	8.36	17.023	12.54	24.7337	12.43	21.5462	14.04	24.0082	10.85	20.3603	7.15	21.1726	12.6	25.9473	14.09	24.0649	11.8	22.0767	9.18	21.6102
Internal primary branch	12.63	28.685	16.35	25.6591	16.14	25.6313	16.68	27.0384	18.3	31.5354	16.5	28.2825			9.32	22.984	11.66	23.7426	14.67	28.9349	15.41	26.7117	15.11	25.8379	14.17	26.5904	8.49	25.1407	13.12	27.0181	16.5	28.181	14.73	27.5585	11.55	27.1893
Internal secondary branch	9.91	22.5074	14.08	22.0967	14.56	23.1221	14.48	23.4722	13.12	22.609	13.2	22.626			7.26	17.9038	10.35	21.0751	12.25	24.1617	12.43	21.5462	12.11	20.7079	11.97	22.462	8.41	24.9038	10.64	21.911	14.13	24.1332	11.27	21.0851	10.16	23.9171
Claw 4 heights
Anterior primary branch	14.23	32.3189	19.09	29.9592	18.12	28.7756	17.75	28.7729	16.39	28.244	16.94	29.0367			10.19	25.1295	14.33	29.1794	17.52	34.5562	17.91	31.0452	15.79	27.0007	15.73	29.5177	11.09	32.8398	15.9	32.743	19.23	32.8437	16.05	30.0281	13.77	32.4153
Anterior secondary branch	9.94	22.5755	14.11	22.1438	13.73	21.804	13.85	22.451	11.71	20.1792	13.52	23.1745			6.62	16.3255	11.13	22.6634	12.99	25.6213	13.13	22.7596	13.78	23.5636	12.46	23.3815	7.74	22.9198	11.77	24.2381	14.63	24.9872	11.17	20.898	9.79	23.0461
Posterior primary branch	14.51	32.9548	18.42	28.9077	19.58	31.0942	16.73	27.1195	19.4	33.431	16.42	28.1454			11.42	28.1628	14.24	28.9961	17.56	34.6351	17.69	30.6639	21.17	36.2004	14.85	27.8664	10.92	32.3364	15.76	32.4547	17.91	30.5892	17.32	32.4041	14	32.9567
Posterior secondary branch	11.13	25.2782	14.96	23.4777	14.74	23.408	12.57	20.3761	13.57	23.3845	12.48	21.3918			8.4	20.7152	11.48	23.3761	14.08	27.7712	13.79	23.9036	13.64	23.3242	12.21	22.9124	7.83	23.1863	12.92	26.6063	13.78	23.5354	12.17	22.7689	10.59	24.9294
Eyes (0 = absent; 1 = present)	0		0		0		0		0		0				0		0		0		0		0		0		0		0		0		0		0
Cuticular pores (0/1)	0				0		0		0		0				0		0		0		0		0		0		0		0		0		0		0
Lunules I with teeth (0/1)	0		0		0		0				0				0		0		0		0		0		0		0		0		0		0		0
Lunules II with teeth (0/1)	0		0		0		0		0		0				0				0		0		0		0		0		0		0		0		0
Lunules III with teeth (0/1)	0		0		0		0		0		0				0				0		0		0		0		0		0		0		0		0
Lunules IV with teeth (0/1)	0		0		0		0		0		0				0		0		0		0		0		0		0		0		0		0		0
Granulation on legs I (0/1)	1		1		1		1				1				1		1		1		1		1		1		1		1		1		1		1
Granulation on legs II (0/1)	1		1		1		1		1		1				1				1		1		1		1		1		1		1		1		1
Granulation on legs III (0/1)	1		1		1		1		1		1				1		1		1		1		1		1		1		1		1		1		1
Granulation on legs IV (0/1)	1		1		1		1		1		1				1		1		1		1		1		1		1		1		1		1		1
	8.25		8.18		8.19		8.2		8.21		8.1/S				8.7		8.6		8.23		8.23		8.23		8.24		8.25		8.25		8.25		8.25		8.25
[truncated: 19 more columns]

## Sheet: eggs
CHARACTER	8.22	8.22	8.14	8.14	8.14	8.13	8.13	8.13	8.13	8.12	8.12	8.12	8.12	8.11	8.11	16	17	18	19	20	21	22	23	24	25	26	27	28	29	30		CHARACTER	N	RANGE			MEAN	SD
Egg bare diameter	68.47	80.48	69.75	68.44	68.65	62.86	63.91	81.14	79.18	67.01	89.73	89.06	88.89	79.32	67.46																	Egg bare diameter	15	62.86	–	89.73	74.9567	9.47193
Egg full diameter	93.8	104.76	93.64	96.12	92.5	98.24	94.76	108.12	99.99	95.6	115.73	117.48	112.32	110.58	88.71																	Egg full diameter	15	88.71	–	117.48	101.49	9.25653
Process height	14.18	12.43	11.29	15.59	16.63	16.95	12.98	13.27	12.76	15.17	15.01	11.28		15	11.27																	Process height	42	11.26	–	16.95	13.861	1.50454
	14.86	12.99	13.67	12.78	12.69	15.03	14.86	12.32	12.51	14.77	13.79	11.26		15.65	12.98																	Process base width	42	13.59	–	18.9	15.8571	1.24388
	15.95	14.53	14.46	14.56	14.52	16.61	13.09	13.54	12.92	14.34	12.94	12.2		15.25	13.28																	Process base/height ratio	42	0.99941	–	1.36287	1.15162	0.102002
Process base width	15.56	15.1	14.64	15.8	17.87	16.94	15.14	13.73	15.4	16.66	16.14	14.97		15.01	14.57																	Inter-process distance	41	1	–	5.48	2.74171	1.02724
	15.48	14.79	14.92	15.27	16.38	17.72	18.06	13.59	15.6	15.84	17.03	13.93		17.21	15.9																	Number of processes on the egg circumference	14	10	–	12	10.7857	0.801784
	16.5	15.31	15.93	17.65	16.18	16.63	17.84	13.97	15.92	18.9	16.18	14.45		15.91	15.38
Process base/height ratio	1.09732	1.2148	1.29672	1.01347	1.07456	0.99941	1.16641	1.03466	1.2069	1.09822	1.07528	1.32713		1.00067	1.29281
	1.04172	1.13857	1.09144	1.19484	1.29078	1.17898	1.21534	1.10308	1.247	1.07244	1.23495	1.23712		1.09968	1.22496
	1.03448	1.05368	1.10166	1.21223	1.11433	1.0012	1.36287	1.03176	1.2322	1.31799	1.25039	1.18443		1.04328	1.15813
Inter-process distance	3.51	3.31	2.68	5.22	3.02	1.19	2.64	1	2.37	1.79	2.93		3.55	2.68	1.78
	3.08	2.61	2.88	2.99	2.18	1.43	2.42	3.09	2.23	1.77	1.68		1.87	2.54	2.93
	2.21	2.33	4.4	5.48	2.41	2.62	5.01	1.57	2.9		4.41		2.09	2.2	3.41
Number of processes on the egg circumference	11	10	12	10	12	11	11	12	10	10	10	10		11	11

## Sheet: animals_stats (µm)
Species	Population	Individual	Body length	Buccal tube length	Pharyngeal tube length	Buccopharyngeal tube length	Buccal/pharyngeal tube length ratio	Stylet support insertion point	Buccal tube external width	Buccal tube internal width	Ventral lamina length	Macroplacoid 1	Macroplacoid 2	Macroplacoid 3	Microplacoid	Septulum	Macroplacoid row	Placoid row	Claw 1 external base	Claw 1 external primary branch	Claw 1 external secondary branch	Claw 1 external base/primary branch	Claw 1 internal base	Claw 1 internal primary branch	Claw 1 internal secondary branch	Claw 1 internal base/primary branch	Claw 2 external base	Claw 2 external primary branch	Claw 2 external secondary branch	Claw 2 external base/primary branch	Claw 2 internal base	Claw 2 internal primary branch	Claw 2 internal secondary branch	Claw 2 internal base/primary branch	Claw 3 external base	Claw 3 external primary branch	Claw 3 external secondary branch	Claw 3 external base/primary branch	Claw 3 internal base	Claw 3 internal primary branch	Claw 3 internal secondary branch	Claw 3 internal base/primary branch	Claw 4 anterior base	Claw 4 anterior primary branch	Claw 4 anterior secondary branch	Claw 4 anterior base/primary branch	Claw 4 posterior base	Claw 4 posterior primary branch	Claw 4 posterior secondary branch
Paramacrobiotus fairbanksi	Canada	1 (HOL)	432.8	44.03	#REF!	#REF!	#REF!	33.88	9.25	7.12	26.29	7.25	6.84	7.63	3.54	#REF!	23.35	30.15	#REF!	12.92	9.12	#REF!	#REF!	10.93	8.66	#REF!	#REF!	13.16	10.72	#REF!	#REF!	11.82	9.23	#REF!	#REF!	13.78	9.32	#REF!	#REF!	12.63	9.91	#REF!	#REF!	14.23	9.94	#REF!	#REF!	14.51	11.13
Paramacrobiotus fairbanksi	Canada	2	770.3	63.72	#REF!	#REF!	#REF!	50.95	13.66	11.36	38.28	10.3	10.17	10.52	4.33	#REF!	36.04	45.1	#REF!	16.57	13.4	#REF!	#REF!	13.95	11.41	#REF!	#REF!	16.85	15.04	#REF!	#REF!	14.2	13.53	#REF!	#REF!	17.93	14.08	#REF!	#REF!	16.35	14.08	#REF!	#REF!	19.09	14.11	#REF!	#REF!	18.42	14.96
Paramacrobiotus fairbanksi	Canada	3	772.07	62.97	#REF!	#REF!	#REF!	48.98	12.98	10.12	37.14	11.11	9.14	11.34	3.89	#REF!	34.81	46.83	#REF!	16.57	12.91	#REF!	#REF!	15.12	12.64	#REF!	#REF!	18.05	14.78	#REF!	#REF!	15.07	13.13	#REF!	#REF!	15.86	13.02	#REF!	#REF!	16.14	14.56	#REF!	#REF!	18.12	13.73	#REF!	#REF!	19.58	14.74
Paramacrobiotus fairbanksi	Canada	4	734.19	61.69	#REF!	#REF!	#REF!	47.82	13.09	10.28	36.46	10.51	10.36	11.77	5.15	#REF!	35.4	45.85	#REF!	16.69	12.6	#REF!	#REF!	14.35	11.9	#REF!	#REF!	17.87	13.52	#REF!	#REF!	15.38	13.38	#REF!	#REF!	17.71	14.38	#REF!	#REF!	16.68	14.48	#REF!	#REF!	17.75	13.85	#REF!	#REF!	16.73	12.57
Paramacrobiotus fairbanksi	Canada	5	642.24	58.03	#REF!	#REF!	#REF!	46.35	13.66	9.68	35.61	10.7	9.73	11.2	4.12	#REF!	34.54	42.66	#REF!			#REF!	#REF!			#REF!	#REF!	17.13	13.91	#REF!	#REF!	14.57	11.55	#REF!	#REF!	18.28	14.27	#REF!	#REF!	18.3	13.12	#REF!	#REF!	16.39	11.71	#REF!	#REF!	19.4	13.57
Paramacrobiotus fairbanksi	Canada	6	437.18	58.34	#REF!	#REF!	#REF!	46.22	11.37	8.93	36.84	9.8	8.37	9.9	4.43	#REF!	30.24	40.24	#REF!	15.9	12.02	#REF!	#REF!	16.07	11.92	#REF!	#REF!	14.29	12.54	#REF!	#REF!	16.18	12.47	#REF!	#REF!	17.24	12.98	#REF!	#REF!	16.5	13.2	#REF!	#REF!	16.94	13.52	#REF!	#REF!	16.42	12.48
Paramacrobiotus fairbanksi	Canada	7			#REF!	#REF!	#REF!									#REF!			#REF!			#REF!	#REF!			#REF!	#REF!			#REF!	#REF!			#REF!	#REF!			#REF!	#REF!			#REF!	#REF!			#REF!	#REF!
Paramacrobiotus fairbanksi	Canada	8	504.67	40.55	#REF!	#REF!	#REF!	31.93	6.23	4.48	24.54	5.06	4.56	7	3.13	#REF!	21.54	27.9	#REF!	8.88	7.81	#REF!	#REF!	8.41	6.94	#REF!	#REF!	9.21	7.16	#REF!	#REF!	8.47	7.81	#REF!	#REF!	9.59	7.08	#REF!	#REF!	9.32	7.26	#REF!	#REF!	10.19	6.62	#REF!	#REF!	11.42	8.4
Paramacrobiotus fairbanksi	Canada	9	499.26	49.11	#REF!	#REF!	#REF!	38.52	10.02	6.62	27.89	7.92	7.16	9.56	3.77	#REF!	26.77	33.88	#REF!	12.25	9.5	#REF!	#REF!	11.33	9.04	#REF!	#REF!	11.41		#REF!	#REF!	13.08	9.61	#REF!	#REF!	10.04	8.36	#REF!	#REF!	11.66	10.35	#REF!	#REF!	14.33	11.13	#REF!	#REF!	14.24	11.48
Paramacrobiotus fairbanksi	Canada	10	494.9	50.7	#REF!	#REF!	#REF!	39.87	12.01	8.88	29.38	8.61	7.33	9.43	3.66	#REF!	28.77	36.06	#REF!	15.26	10.26	#REF!	#REF!	14.69	12.21	#REF!	#REF!	13.66	12.54	#REF!	#REF!	13.06	11.55	#REF!	#REF!	16.18	12.54	#REF!	#REF!	14.67	12.25	#REF!	#REF!	17.52	12.99	#REF!	#REF!	17.56	14.08
Paramacrobiotus fairbanksi	Canada	11	636.82	57.69	#REF!	#REF!	#REF!	45.6	12.42	8.39	37.15	9.53	8.64	12.08	4.29	#REF!	34.11	40.89	#REF!	16.35	12.87	#REF!	#REF!	15	13.89	#REF!	#REF!	17.4	13.66	#REF!	#REF!	15.01	12.45	#REF!	#REF!	14.57	12.43	#REF!	#REF!	15.41	12.43	#REF!	#REF!	17.91	13.13	#REF!	#REF!	17.69	13.79
Paramacrobiotus fairbanksi	Canada	12	667.45	58.48	#REF!	#REF!	#REF!	44.06	12.58	9.31	37.81	11.65	9.39	11.05	4.17	#REF!	34.09	41.7	#REF!	16.63	11.59	#REF!	#REF!	15.73	12.45	#REF!	#REF!	17.54	15.45	#REF!	#REF!	13.76	11.13	#REF!	#REF!	18.56	14.04	#REF!	#REF!	15.11	12.11	#REF!	#REF!	15.79	13.78	#REF!	#REF!	21.17	13.64
Paramacrobiotus fairbanksi	Canada	13	506.08	53.29	#REF!	#REF!	#REF!	42.15	11.72	7.92	32.96	9.52	6.99	10.35	5.17	#REF!	29.59	39.19	#REF!	15.68	10.54	#REF!	#REF!	14.29	11.11	#REF!	#REF!	14.43	10.66	#REF!	#REF!	14.38	12.32	#REF!	#REF!	15.1	10.85	#REF!	#REF!	14.17	11.97	#REF!	#REF!	15.73	12.46	#REF!	#REF!	14.85	12.21
Paramacrobiotus fairbanksi	Canada	14	303.29	33.77	#REF!	#REF!	#REF!	26.33	7.15	4.88		4.66	3.86	5.02	2.96	#REF!		23.56	#REF!	8.17	5.46	#REF!	#REF!	8.48	7.26	#REF!	#REF!	9.98	7.28	#REF!	#REF!	7.97	6.86	#REF!	#REF!	9.04	7.15	#REF!	#REF!	8.49	8.41	#REF!	#REF!	11.09	7.74	#REF!	#REF!	10.92	7.83
Paramacrobiotus fairbanksi	Canada	15	513.39	48.56	#REF!	#REF!	#REF!	38.08	10.79	7.48	28.34	7.28	6.64	7.63	3.69	#REF!	26.34	34.21	#REF!	14.93	10.54	#REF!	#REF!	12.31	10.96	#REF!	#REF!	11.13	9.38	#REF!	#REF!	12.6	9.69	#REF!	#REF!	15.5	12.6	#REF!	#REF!	13.12	10.64	#REF!	#REF!	15.9	11.77	#REF!	#REF!	15.76	12.92
Paramacrobiotus fairbanksi	Canada	16	649.14	58.55	#REF!	#REF!	#REF!	44.79	13.31	8.49	33.01	11.31	9.04	11.82	4.59	#REF!	33.66	44.39	#REF!	17.89	14.77	#REF!	#REF!	16.14	11.99	#REF!	#REF!	17.72	13.39	#REF!	#REF!	15.27	13.81	#REF!	#REF!	17.74	14.09	#REF!	#REF!	16.5	14.13	#REF!	#REF!	19.23	14.63	#REF!	#REF!	17.91	13.78
Paramacrobiotus fairbanksi	Canada	17	587.46	53.45	#REF!	#REF!	#REF!	42.25	12.71	9.66		9.2	8.61	10.49	4.72	#REF!	30.94	40.14	#REF!	14.08	11.27	#REF!	#REF!	13.53	12.45	#REF!	#REF!	15.72	11.29	#REF!	#REF!	14.1	11.47	#REF!	#REF!	15.2	11.8	#REF!	#REF!	14.73	11.27	#REF!	#REF!	16.05	11.17	#REF!	#REF!	17.32	12.17
Paramacrobiotus fairbanksi	Canada	18	428.41	42.48	#REF!	#REF!	#REF!	33.45	8.95	5.99	26.57	7	5.68	7.47	3.64	#REF!	22.95	29.84	#REF!	11.98	9.35	#REF!	#REF!	10.71	9.02	#REF!	#REF!	12.35	9.49	#REF!	#REF!	11.78	9.31	#REF!	#REF!	11.57	9.18	#REF!	#REF!	11.55	10.16	#REF!	#REF!	13.77	9.79	#REF!	#REF!	14	10.59
Paramacrobiotus fairbanksi	Canada	19			#REF!	#REF!	#REF!									#REF!			#REF!			#REF!	#REF!			#REF!	#REF!			#REF!	#REF!			#REF!	#REF!			#REF!	#REF!			#REF!	#REF!			#REF!	#REF!
Paramacrobiotus fairbanksi	Canada	20			#REF!	#REF!	#REF!									#REF!			#REF!			#REF!	#REF!			#REF!	#REF!			#REF!	#REF!			#REF!	#REF!			#REF!	#REF!			#REF!	#REF!			#REF!	#REF!
Paramacrobiotus fairbanksi	Canada	21			#REF!	#REF!	#REF!									#REF!			#REF!			#REF!	#REF!			#REF!	#REF!			#REF!	#REF!			#REF!	#REF!			#REF!	#REF!			#REF!	#REF!			#REF!	#REF!
Paramacrobiotus fairbanksi	Canada	22			#REF!	#REF!	#REF!									#REF!			#REF!			#REF!	#REF!			#REF!	#REF!			#REF!	#REF!			#REF!	#REF!			#REF!	#REF!			#REF!	#REF!			#REF!	#REF!
Paramacrobiotus fairbanksi	Canada	23			#REF!	#REF!	#REF!									#REF!			#REF!			#REF!	#REF!			#REF!	#REF!			#REF!	#REF!			#REF!	#REF!			#REF!	#REF!			#REF!	#REF!			#REF!	#REF!
Paramacrobiotus fairbanksi	Canada	24			#REF!	#REF!	#REF!									#REF!			#REF!			#REF!	#REF!			#REF!	#REF!			#REF!	#REF!			#REF!	#REF!			#REF!	#REF!			#REF!	#REF!			#REF!	#REF!
Paramacrobiotus fairbanksi	Canada	25			#REF!	#REF!	#REF!									#REF!			#REF!			#REF!	#REF!			#REF!	#REF!			#REF!	#REF!			#REF!	#REF!			#REF!	#REF!			#REF!	#REF!			#REF!	#REF!
Paramacrobiotus fairbanksi	Canada	26			#REF!	#REF!	#REF!									#REF!			#REF!			#REF!	#REF!			#REF!	#REF!			#REF!	#REF!			#REF!	#REF!			#REF!	#REF!			#REF!	#REF!			#REF!	#REF!
Paramacrobiotus fairbanksi	Canada	27			#REF!	#REF!	#REF!									#REF!			#REF!			#REF!	#REF!			#REF!	#REF!			#REF!	#REF!			#REF!	#REF!			#REF!	#REF!			#REF!	#REF!			#REF!	#REF!
Paramacrobiotus fairbanksi	Canada	28			#REF!	#REF!	#REF!									#REF!			#REF!			#REF!	#REF!			#REF!	#REF!			#REF!	#REF!			#REF!	#REF!			#REF!	#REF!			#REF!	#REF!			#REF!	#REF!
Paramacrobiotus fairbanksi	Canada	29			#REF!	#REF!	#REF!									#REF!			#REF!			#REF!	#REF!			#REF!	#REF!			#REF!	#REF!			#REF!	#REF!			#REF!	#REF!			#REF!	#REF!			#REF!	#REF!
Paramacrobiotus fairbanksi	Canada	30			#REF!	#REF!	#REF!									#REF!			#REF!			#REF!	#REF!			#REF!	#REF!			#REF!	#REF!			#REF!	#REF!			#REF!	#REF!			#REF!	#REF!			#REF!	#REF!
[truncated: 1 more columns]

## Sheet: animals_stats (pt)
Species	Population	Individual	Body length	Pharyngeal tube length	Buccopharyngeal tube length	Stylet support insertion point	Buccal tube external width	Buccal tube internal width	Ventral lamina length	Macroplacoid 1	Macroplacoid 2	Macroplacoid 3	Microplacoid	Septulum	Macroplacoid row	Placoid row	Claw 1 external base	Claw 1 external primary branch	Claw 1 external secondary branch	Claw 1 internal base	Claw 1 internal primary branch	Claw 1 internal secondary branch	Claw 2 external base	Claw 2 external primary branch	Claw 2 external secondary branch	Claw 2 internal base	Claw 2 internal primary branch	Claw 2 internal secondary branch	Claw 3 external base	Claw 3 external primary branch	Claw 3 external secondary branch	Claw 3 internal base	Claw 3 internal primary branch	Claw 3 internal secondary branch	Claw 4 anterior base	Claw 4 anterior primary branch	Claw 4 anterior secondary branch	Claw 4 posterior base	Claw 4 posterior primary branch	Claw 4 posterior secondary branch
Paramacrobiotus fairbanksi	Canada	1 (HOL)	982.966	#REF!	#REF!	76.9475	21.0084	16.1708	59.7093	16.466	15.5349	17.3291	8.03997	#REF!	53.032	68.476	#REF!	29.3436	20.7132	#REF!	24.824	19.6684	#REF!	29.8887	24.347	#REF!	26.8453	20.963	#REF!	31.2968	21.1674	#REF!	28.685	22.5074	#REF!	32.3189	22.5755	#REF!	32.9548	25.2782
Paramacrobiotus fairbanksi	Canada	2	1208.88	#REF!	#REF!	79.9592	21.4375	17.828	60.0753	16.1645	15.9605	16.5097	6.79535	#REF!	56.5599	70.7784	#REF!	26.0044	21.0295	#REF!	21.8927	17.9065	#REF!	26.4438	23.6033	#REF!	22.285	21.2335	#REF!	28.1387	22.0967	#REF!	25.6591	22.0967	#REF!	29.9592	22.1438	#REF!	28.9077	23.4777
Paramacrobiotus fairbanksi	Canada	3	1226.09	#REF!	#REF!	77.7831	20.613	16.0711	58.9805	17.6433	14.5148	18.0086	6.17754	#REF!	55.2803	74.3687	#REF!	26.3141	20.5018	#REF!	24.0114	20.0731	#REF!	28.6644	23.4715	#REF!	23.932	20.8512	#REF!	25.1866	20.6765	#REF!	25.6313	23.1221	#REF!	28.7756	21.804	#REF!	31.0942	23.408
Paramacrobiotus fairbanksi	Canada	4	1190.13	#REF!	#REF!	77.5166	21.219	16.664	59.102	17.0368	16.7936	19.0793	8.34819	#REF!	57.3837	74.3232	#REF!	27.0546	20.4247	#REF!	23.2615	19.29	#REF!	28.9674	21.916	#REF!	24.9311	21.6891	#REF!	28.7081	23.3101	#REF!	27.0384	23.4722	#REF!	28.7729	22.451	#REF!	27.1195	20.3761
Paramacrobiotus fairbanksi	Canada	5	1106.74	#REF!	#REF!	79.8725	23.5395	16.681	61.3648	18.4387	16.7672	19.3004	7.09978	#REF!	59.5209	73.5137	#REF!			#REF!			#REF!	29.5192	23.9704	#REF!	25.1077	19.9035	#REF!	31.5009	24.5907	#REF!	31.5354	22.609	#REF!	28.244	20.1792	#REF!	33.431	23.3845
Paramacrobiotus fairbanksi	Canada	6	749.366	#REF!	#REF!	79.2252	19.4892	15.3068	63.1471	16.7981	14.3469	16.9695	7.59342	#REF!	51.8341	68.975	#REF!	27.254	20.6034	#REF!	27.5454	20.432	#REF!	24.4943	21.4947	#REF!	27.734	21.3747	#REF!	29.5509	22.2489	#REF!	28.2825	22.626	#REF!	29.0367	23.1745	#REF!	28.1454	21.3918
Paramacrobiotus fairbanksi	Canada	7		#REF!	#REF!									#REF!			#REF!			#REF!			#REF!			#REF!			#REF!			#REF!			#REF!			#REF!
Paramacrobiotus fairbanksi	Canada	8	1244.56	#REF!	#REF!	78.7423	15.3637	11.0481	60.5179	12.4784	11.2454	17.2626	7.71887	#REF!	53.1196	68.8039	#REF!	21.8989	19.2602	#REF!	20.7398	17.1147	#REF!	22.7127	17.6572	#REF!	20.8878	19.2602	#REF!	23.6498	17.4599	#REF!	22.984	17.9038	#REF!	25.1295	16.3255	#REF!	28.1628	20.7152
Paramacrobiotus fairbanksi	Canada	9	1016.62	#REF!	#REF!	78.4362	20.4032	13.4799	56.7909	16.1271	14.5795	19.4665	7.67664	#REF!	54.5103	68.988	#REF!	24.944	19.3443	#REF!	23.0707	18.4077	#REF!	23.2336		#REF!	26.6341	19.5683	#REF!	20.4439	17.023	#REF!	23.7426	21.0751	#REF!	29.1794	22.6634	#REF!	28.9961	23.3761
Paramacrobiotus fairbanksi	Canada	10	976.134	#REF!	#REF!	78.6391	23.6884	17.5148	57.9487	16.9822	14.4576	18.5996	7.21893	#REF!	56.7456	71.1243	#REF!	30.0986	20.2367	#REF!	28.9744	24.0828	#REF!	26.9428	24.7337	#REF!	25.7594	22.7811	#REF!	31.9132	24.7337	#REF!	28.9349	24.1617	#REF!	34.5562	25.6213	#REF!	34.6351	27.7712
Paramacrobiotus fairbanksi	Canada	11	1103.87	#REF!	#REF!	79.0432	21.5289	14.5432	64.3959	16.5193	14.9766	20.9395	7.4363	#REF!	59.1264	70.8788	#REF!	28.3411	22.3089	#REF!	26.001	24.077	#REF!	30.1612	23.6783	#REF!	26.0184	21.5809	#REF!	25.2557	21.5462	#REF!	26.7117	21.5462	#REF!	31.0452	22.7596	#REF!	30.6639	23.9036
Paramacrobiotus fairbanksi	Canada	12	1141.33	#REF!	#REF!	75.342	21.5116	15.92	64.6546	19.9213	16.0568	18.8953	7.13064	#REF!	58.2934	71.3064	#REF!	28.4371	19.8187	#REF!	26.8981	21.2893	#REF!	29.9932	26.4193	#REF!	23.5294	19.0321	#REF!	31.7373	24.0082	#REF!	25.8379	20.7079	#REF!	27.0007	23.5636	#REF!	36.2004	23.3242
Paramacrobiotus fairbanksi	Canada	13	949.672	#REF!	#REF!	79.0955	21.9929	14.8621	61.8503	17.8645	13.1169	19.422	9.70163	#REF!	55.5264	73.541	#REF!	29.4239	19.7786	#REF!	26.8155	20.8482	#REF!	27.0783	20.0038	#REF!	26.9844	23.1188	#REF!	28.3355	20.3603	#REF!	26.5904	22.462	#REF!	29.5177	23.3815	#REF!	27.8664	22.9124
Paramacrobiotus fairbanksi	Canada	14	898.105	#REF!	#REF!	77.9686	21.1726	14.4507		13.7992	11.4303	14.8653	8.76518	#REF!		69.7661	#REF!	24.1931	16.1682	#REF!	25.111	21.4984	#REF!	29.5529	21.5576	#REF!	23.6008	20.3139	#REF!	26.7693	21.1726	#REF!	25.1407	24.9038	#REF!	32.8398	22.9198	#REF!	32.3364	23.1863
Paramacrobiotus fairbanksi	Canada	15	1057.23	#REF!	#REF!	78.4185	22.2199	15.4036	58.3608	14.9918	13.6738	15.7125	7.59885	#REF!	54.2422	70.4489	#REF!	30.7455	21.7051	#REF!	25.3501	22.57	#REF!	22.9201	19.3163	#REF!	25.9473	19.9547	#REF!	31.9193	25.9473	#REF!	27.0181	21.911	#REF!	32.743	24.2381	#REF!	32.4547	26.6063
Paramacrobiotus fairbanksi	Canada	16	1108.69	#REF!	#REF!	76.4987	22.7327	14.5004	56.3792	19.3168	15.4398	20.1879	7.83945	#REF!	57.4893	75.8155	#REF!	30.5551	25.2263	#REF!	27.5662	20.4782	#REF!	30.2647	22.8693	#REF!	26.0803	23.5867	#REF!	30.2989	24.0649	#REF!	28.181	24.1332	#REF!	32.8437	24.9872	#REF!	30.5892	23.5354
Paramacrobiotus fairbanksi	Canada	17	1099.08	#REF!	#REF!	79.0458	23.7792	18.073		17.2123	16.1085	19.6258	8.83068	#REF!	57.8859	75.0982	#REF!	26.3424	21.0851	#REF!	25.3134	23.2928	#REF!	29.4107	21.1225	#REF!	26.3798	21.4593	#REF!	28.4378	22.0767	#REF!	27.5585	21.0851	#REF!	30.0281	20.898	#REF!	32.4041	22.7689
Paramacrobiotus fairbanksi	Canada	18	1008.5	#REF!	#REF!	78.7429	21.0687	14.1008	62.5471	16.4783	13.371	17.5847	8.56874	#REF!	54.0254	70.2448	#REF!	28.2015	22.0104	#REF!	25.2119	21.2335	#REF!	29.0725	22.3399	#REF!	27.7307	21.9162	#REF!	27.2363	21.6102	#REF!	27.1893	23.9171	#REF!	32.4153	23.0461	#REF!	32.9567	24.9294
Paramacrobiotus fairbanksi	Canada	19		#REF!	#REF!									#REF!			#REF!			#REF!			#REF!			#REF!			#REF!			#REF!			#REF!			#REF!
Paramacrobiotus fairbanksi	Canada	20		#REF!	#REF!									#REF!			#REF!			#REF!			#REF!			#REF!			#REF!			#REF!			#REF!			#REF!
Paramacrobiotus fairbanksi	Canada	21		#REF!	#REF!									#REF!			#REF!			#REF!			#REF!			#REF!			#REF!			#REF!			#REF!			#REF!
Paramacrobiotus fairbanksi	Canada	22		#REF!	#REF!									#REF!			#REF!			#REF!			#REF!			#REF!			#REF!			#REF!			#REF!			#REF!
Paramacrobiotus fairbanksi	Canada	23		#REF!	#REF!									#REF!			#REF!			#REF!			#REF!			#REF!			#REF!			#REF!			#REF!			#REF!
Paramacrobiotus fairbanksi	Canada	24		#REF!	#REF!									#REF!			#REF!			#REF!			#REF!			#REF!			#REF!			#REF!			#REF!			#REF!
Paramacrobiotus fairbanksi	Canada	25		#REF!	#REF!									#REF!			#REF!			#REF!			#REF!			#REF!			#REF!			#REF!			#REF!			#REF!
Paramacrobiotus fairbanksi	Canada	26		#REF!	#REF!									#REF!			#REF!			#REF!			#REF!			#REF!			#REF!			#REF!			#REF!			#REF!
Paramacrobiotus fairbanksi	Canada	27		#REF!	#REF!									#REF!			#REF!			#REF!			#REF!			#REF!			#REF!			#REF!			#REF!			#REF!
Paramacrobiotus fairbanksi	Canada	28		#REF!	#REF!									#REF!			#REF!			#REF!			#REF!			#REF!			#REF!			#REF!			#REF!			#REF!
Paramacrobiotus fairbanksi	Canada	29		#REF!	#REF!									#REF!			#REF!			#REF!			#REF!			#REF!			#REF!			#REF!			#REF!			#REF!
Paramacrobiotus fairbanksi	Canada	30		#REF!	#REF!									#REF!			#REF!			#REF!			#REF!			#REF!			#REF!			#REF!			#REF!			#REF!

## Sheet: eggs_stats (µm)
Species	Population	egg	Egg bare diameter	Egg full diameter	Process height	Process base width	Process base/height ratio	Terminal disc width	Inter-process distance	Number of processes on the egg circumference
Paramacrobiotus fairbanksi	Canada	8.22	68.47	93.8	14.9967	15.8467	1.05784	#REF!	2.93333	11
Paramacrobiotus fairbanksi	Canada	8.22	80.48	104.76	13.3167	15.0667	1.13568	#REF!	2.75	10
Paramacrobiotus fairbanksi	Canada	8.14	69.75	93.64	13.14	15.1633	1.16327	#REF!	3.32	12
Paramacrobiotus fairbanksi	Canada	8.14	68.44	96.12	14.31	16.24	1.14018	#REF!	4.56333	10
Paramacrobiotus fairbanksi	Canada	8.14	68.65	92.5	14.6133	16.81	1.15989	#REF!	2.53667	12
Paramacrobiotus fairbanksi	Canada	8.13	62.86	98.24	16.1967	17.0967	1.05986	#REF!	1.74667	11
Paramacrobiotus fairbanksi	Canada	8.13	63.91	94.76	13.6433	17.0133	1.24821	#REF!	3.35667	11
Paramacrobiotus fairbanksi	Canada	8.13	81.14	108.12	13.0433	13.7633	1.0565	#REF!	1.88667	12
Paramacrobiotus fairbanksi	Canada	8.13	79.18	99.99	12.73	15.64	1.2287	#REF!	2.5	10
Paramacrobiotus fairbanksi	Canada	8.12	67.01	95.6	14.76	17.1333	1.16289	#REF!	1.78	10
Paramacrobiotus fairbanksi	Canada	8.12	89.73	115.73	13.9133	16.45	1.18687	#REF!	3.00667	10
Paramacrobiotus fairbanksi	Canada	8.12	89.06	117.48	11.58	14.45	1.24956	#REF!		10
Paramacrobiotus fairbanksi	Canada	8.12	88.89	112.32				#REF!	2.50333
Paramacrobiotus fairbanksi	Canada	8.11	79.32	110.58	15.3	16.0433	1.04788	#REF!	2.47333	11
Paramacrobiotus fairbanksi	Canada	8.11	67.46	88.71	12.51	15.2833	1.2253	#REF!	2.70667	11
Paramacrobiotus fairbanksi	Canada	16						#REF!
Paramacrobiotus fairbanksi	Canada	17						#REF!
Paramacrobiotus fairbanksi	Canada	18						#REF!
Paramacrobiotus fairbanksi	Canada	19						#REF!
Paramacrobiotus fairbanksi	Canada	20						#REF!
Paramacrobiotus fairbanksi	Canada	21						#REF!
Paramacrobiotus fairbanksi	Canada	22						#REF!
Paramacrobiotus fairbanksi	Canada	23						#REF!
Paramacrobiotus fairbanksi	Canada	24						#REF!
Paramacrobiotus fairbanksi	Canada	25						#REF!
Paramacrobiotus fairbanksi	Canada	26						#REF!
Paramacrobiotus fairbanksi	Canada	27						#REF!
Paramacrobiotus fairbanksi	Canada	28						#REF!
Paramacrobiotus fairbanksi	Canada	29						#REF!
Paramacrobiotus fairbanksi	Canada	30						#REF!
