# Supplementary material for: Morphological and genetic variability in cosmopolitan tardigrade species - Paramacrobiotus fairbanksi Schill, Förster, Dandekar &amp; Wolf, 2010
Source: Research Square preprint supplement (doi:10.21203/rs.3.rs-2736709/v2), 2023-07-17
Supplement: Supplementary file 5 [file cdca05136c69f03db312bd3b.xlsx]

## Sheet: instructions
	INSTRUCTIONS and TERMS OF USE
	1	This is a morphometric template for species of the Tardigrada Order Parachela.
	2	The template caluclates the pt ratio and other relative measures only if all measurements required to calculate a ratio are provided (otherwise the ratio cell remains empty, meaning lack of data). The only numbers you need to enter are absolute measurements in micrometres [μm] in the sheet "individuals". If a structure is not measurable leave the cell empty (enetring zeros will mean that the trai…
	3	The "individuals" sheet automatically calculates basic statistics (number of measurements, range, mean and SD). The table with these statistics is placed after the last (30th) specimen. The summary table can be then copied and pasted directly to MS Word.
	4	If measurements are done on the type series, please enter the holotype in the first column (this way holotype data are automatically copied to the summary table at end of the sheet). If measurements are not done on the type series, you may delete the last two columns in the summary table. You may change specimen/slide names as desired.
	5	If a trait listed is not present in the species you are measuring, remove the entire row (highlight the row, right mouse click, choose "delete").
	6	Data from the sheet "individuals" are automatically copied to the four remaining "stats" sheets. Data in those sheets are arranged for statistical analyses in the majority of statistical software.
	7	If you want to see the formulas behind this template, press Ctrl+` (usually just before "1" on the keyboard). To return to the value view, press Ctrl+` again.
	8	This template can be freely used but each published use must be credited as Morphometric data were handled using the Parachela ver. 1.7 template available from the Tardigrada Register, www.tardigrada.net/register (Michalczyk & Kaczmarek 2013). The reference is: Michalczyk, Ł. & Kaczmarek, Ł. (2013) The Tardigrada Register: a comprehensive online data repository for tardigrade taxonomy. Journal of…
	9	Copyright by Łukasz Michalczyk. Enquires and suggestions: LM@tardigrada.net

## Sheet: general info
	Species		Paramacrobiotus fairbanksi
	Population		Albania
	Type series		No
	Author		Pushpalata Kayastha
	Date		02.10.2020

## Sheet: animals
SPECIMEN	1 (HOL)		2		3		4		5		6		7		8		9		10		11		12		13		14		15		16		17		18		19		20		21		22		23		24		25
CHARACTER	µm	pt	µm	pt	µm	pt	µm	pt	µm	pt	µm	pt	µm	pt	µm	pt	µm	pt	µm	pt	µm	pt	µm	pt	µm	pt	µm	pt	µm	pt	µm	pt	µm	pt	µm	pt	µm	pt	µm	pt	µm	pt	µm	pt	µm	pt	µm	pt	µm
Body length	649.14	1124.05	518.55	1008.46	426.02	1346.03	599.9	1113.61	445.89	993.516	575.88	1051.64	479.55	947.915	637.23	1102.28	532.08	988.812	649.14	1124.05	653.74	1147.31	496.25	962.284	550.29	1013.24	512.67	1020.04	514.77	982.011	543.5	1008.72
Buccopharyngeal tube
Buccal tube length	57.75	–	51.42	–	31.65	–	53.87	–	44.88	–	54.76	–	50.59	–	57.81	–	53.81	–	57.75	–	56.98	–	51.57	–	54.31	–	50.26	–	52.42	–	53.88	–		–		–		–		–		–		–		–		–
Stylet support insertion point	43.97	76.1385	40.82	79.3855	24.64	77.8515	43.55	80.8428	35.56	79.2335	43	78.5245	39.93	78.9286			43.26	80.394	43.97	76.1385	44.77	78.5714	40.61	78.7473	41.9	77.1497	40.44	80.4616	41.6	79.359	42.6	79.0646
Buccal tube external width	14.19	24.5714	9.88	19.2143	7.46	23.5703			9.64	21.4795	12.8	23.3747	10.43	20.6167	12.3	21.2766	10.71	19.9034	14.19	24.5714	11.76	20.6388	11.05	21.4272	10.83	19.9411	9.82	19.5384	10.05	19.1721	11.68	21.6778
Buccal tube internal width	10.68	18.4935	8.42	16.375	5.48	17.3144			7.97	17.7585	10.85	19.8137	8.17	16.1494	9.32	16.1218	9.09	16.8928	10.68	18.4935	9.56	16.7778	8.87	17.1999	9.19	16.9214	8.18	16.2754	8.71	16.6158	9.21	17.0935
Ventral lamina length	34.11	59.0649	29.8	57.9541	18.17	57.4092			25.86	57.6203	31.5	57.5237	29.2	57.7189			32.73	60.8251	34.11	59.0649	33.65	59.0558	29.79	57.7661	32.67	60.1547	30.89	61.4604	30.38	57.955	31.22	57.9436
Placoid lengths
Macroplacoid 1	9.26	16.0346	8.3	16.1416			7.58	14.0709	6.05	13.4804	8.14	14.8649	8.11	16.0308	9.53	16.485	7.33	13.622	9.26	16.0346	9.58	16.8129	7.87	15.2608	8.66	15.9455	7.51	14.9423	8.32	15.8718	7.44	13.8085
Macroplacoid 2	6.94	12.0173	6.72	13.0688	3.75	11.8483	7.05	13.0871	4.94	11.0071	6.79	12.3996	6.49	12.8286	8.08	13.9768	6.63	12.3211	6.94	12.0173	8.28	14.5314	6.47	12.5461	7.28	13.4045	6	11.9379	6.72	12.8195	6.84	12.6949
Macroplacoid 3	10.03	17.368	9.81	19.0782	5.83	18.4202	8.96	16.6326	7.81	17.402	9.1	16.618	9.4	18.5807	11.09	19.1835	9.99	18.5653	10.03	17.368	10.56	18.5328	8.58	16.6376	10.56	19.4439	9.17	18.2451	9.55	18.2182	9.95	18.467
Microplacoid	4.78	8.27706	4.78	9.29599	3.45	10.9005	4.7	8.72471	3.89	8.66756	5.29	9.66034	5.22	10.3182	6.27	10.8459	4.44	8.25125	4.78	8.27706	4.84	8.49421	5.24	10.1609	4.98	9.16958	4.28	8.51572	4.71	8.98512	5.04	9.35412
Macroplacoid row	30.24	52.3636	28.24	54.9203	16.81	53.1122	27.85	51.6985	23.24	51.7825	29.12	53.1775	25.68	50.761			27.25	50.6411	30.24	52.3636	31.98	56.125	26.72	51.8131	28.93	53.2683	26.12	51.9698	27.48	52.4227	27.85	51.6889
Placoid row	39.81	68.9351	35.12	68.3003	21.2	66.9826	37.33	69.2965	29.6	65.9537	37.22	67.9693	33.45	66.1198			36.8	68.3888	39.81	68.9351	40.44	70.9723	35.88	69.5753	37.88	69.7477	33.59	66.8325	35.24	67.2262	36.49	67.7246
Claw 1 heights
External primary branch	15.83	27.4113	12.02	23.3761	10.1	31.9115	13.04	24.2064	12.11	26.9831	15.32	27.9766	14.26	28.1874	14.54	25.1514	13.42	24.9396	15.83	27.4113	14.13	24.7982	14.75	28.6019	16.03	29.5157	12.82	25.5074	13.93	26.5738	14.75	27.3756
External secondary branch	11.02	19.0823	10.16	19.7588	7.23	22.8436	10.09	18.7303	8.93	19.8975	11.84	21.6216	9.66	19.0947	12.1	20.9306	10.5	19.5131	11.02	19.0823	11.56	20.2878	11.23	21.7762	13.21	24.3233	9.99	19.8766	11.21	21.385	11.26	20.8983
Internal primary branch	14.22	24.6234	13.12	25.5154	9.5	30.0158	13.15	24.4106	11.19	24.9332	13.39	24.4522	14.32	28.306	17.3	29.9256	12.98	24.1219	14.22	24.6234	13.93	24.4472	12.89	24.9952	14.87	27.3799	12.7	25.2686	13.07	24.9332	13.21	24.5174
Internal secondary branch	11.51	19.9307	10.35	20.1284	6.55	20.6951	9.94	18.4518	8.82	19.6524	10.92	19.9416	10.9	21.5458	13.67	23.6464	9.95	18.491	11.51	19.9307	10.94	19.1997	10.49	20.3413	12.61	23.2186	10.23	20.3542	10.91	20.8127	10.38	19.265
Claw 2 heights
External primary branch	15.87	27.4805	16.18	31.4664	10.33	32.6382	16.05	29.7939	13.51	30.1025	15.37	28.0679	13.73	27.1398	18.32	31.69	14.74	27.3927	15.87	27.4805	16.09	28.238	12.7	24.6267	15.29	28.1532	13.09	26.0446	14.54	27.7375	14.97	27.784
External secondary branch	12.79	22.1472	11.55	22.4621	8.15	25.7504	12.43	23.0741	9.47	21.1007	12.38	22.6077	11.32	22.376	13.3	23.0064	11.9	22.1148	12.79	22.1472	13.29	23.324	10.2	19.7789	11.89	21.8928	10.31	20.5133	11.13	21.2324	11.34	21.0468
Internal primary branch	15.29	26.4762	13.85	26.935	9.84	31.09	13.85	25.71	11.01	24.5321	13.78	25.1644	12.99	25.677	16.58	28.6802	12.84	23.8617	15.29	26.4762	14	24.57	12.73	24.6849	13.49	24.8389	12.61	25.0895	14.42	27.5086	13.81	25.631
Internal secondary branch	12.39	21.4545	8.61	16.7445	8.2	25.9084	10.59	19.6584	8.25	18.3824	11.56	21.1103			13.75	23.7848	10.45	19.4202	12.39	21.4545	11.55	20.2703	9.59	18.5961	10.55	19.4255	10.62	21.1301	11.74	22.396	10.91	20.2487
Claw 3 heights
External primary branch	16.1	27.8788	14.33	27.8685	11.54	36.4613	15.56	28.8844	13.36	29.7683	15.53	28.3601	14.68	29.0176	18.95	32.7798	15.36	28.5449	16.1	27.8788	16.91	29.6771	14.83	28.757	15.84	29.1659	14.65	29.1484	16.02	30.5609	16.82	31.2175
External secondary branch	13.2	22.8571	10.81	21.0229	8.9	28.1201	12.99	24.1136	11.17	24.8886	13.55	24.7443	10.18	20.1226	14.3	24.7362	10.92	20.2936	13.2	22.8571	11.85	20.7968	12.13	23.5214	11.38	20.9538	10.32	20.5332	12.55	23.9412	11	20.4157
Internal primary branch	14.1	24.4156	12.19	23.7067	9.72	30.7109	14.68	27.2508	11.97	26.6711	14.79	27.0088	13.14	25.9735	15.94	27.5731	13.83	25.7015	14.1	24.4156	14.58	25.5879	12.91	25.0339	13.3	24.489	12.21	24.2937	14.09	26.8791	13.88	25.761
Internal secondary branch	11.43	19.7922			7.65	24.1706	10.94	20.3081	9.61	21.4127	11.62	21.2199	10.12	20.004	13.13	22.7123	10.44	19.4016	11.43	19.7922	12.21	21.4286	9.4	18.2277	10.87	20.0147	11.05	21.9857	11.88	22.6631	11.85	21.9933
Claw 4 heights
Anterior primary branch	17.21	29.8009	14.48	28.1602	11.48	36.2717	14.16	26.2855	12.92	28.7879	16.65	30.4054	16.54	32.6942	19.99	34.5788	15.27	28.3776	17.21	29.8009	17.09	29.993	15.98	30.987	15.63	28.7792	15.99	31.8146	15.95	30.4273	15.71	29.1574
Anterior secondary branch	13.57	23.4978	11.17	21.7231	8.26	26.0979	11.01	20.4381	9.11	20.2986	12.94	23.6304	11.48	22.6922	14.43	24.9611	11.19	20.7954	13.57	23.4978	14.31	25.1141	11.46	22.2222	13.11	24.1392	11.7	23.2789	12.54	23.9222	10.8	20.0445
Posterior primary branch	16.78	29.0563	15.95	31.0191	11.91	37.6303	15.3	28.4017	13.09	29.1667	17.22	31.4463	15.6	30.8361	20.46	35.3918	15.65	29.0838	16.78	29.0563	17.66	30.9933	16.96	32.8873	15.52	28.5767	14.81	29.4668	16.09	30.6944	16.96	31.4774
Posterior secondary branch	13.22	22.8918	11.93	23.2011	7.42	23.4439	11.16	20.7165	10.58	23.574	12.91	23.5756	12.39	24.491	14.2	24.5632	12.32	22.8954	13.22	22.8918	12.42	21.7971	12.62	24.4716	11.8	21.7271	12.18	24.234	12.79	24.3991	13.85	25.7053
Eyes (0 = absent; 1 = present)			0		1												1						0		0		1		0
Cuticular pores (0/1)	0		0		0		0		0		0		0		0		0		0		0		0		0		0		0		0		0
Lunules I with teeth (0/1)	0		0		0		0		0		0		0		0		0		0		0		0		0		0		0		0		0
Lunules II with teeth (0/1)	0		0		0		0		0		0		0		0		0		0		0		0		0		0		0		0		0
Lunules III with teeth (0/1)	0		0		0		0		0		0		0		0		0		0		0		0		0		0		0		0		0
Lunules IV with teeth (0/1)	1		1		1		1		1		1		1		1		1		1		1		1		1		1		1		1		1
Granulation on legs I (0/1)	1		1		1		1		1		1		1		1		1		1		1		1		1		1		1		1		1
Granulation on legs II (0/1)	1		1		1		1		1		1		1		1		1		1		1		1		1		1		1		1		1
Granulation on legs III (0/1)	1		1		1		1		1		1		1		1		1		1		1		1		1		1		1		1		1
Granulation on legs IV (0/1)	1		1		1		1		1		1		1		1		1		1		1		1		1		1		1		1		1
[truncated: 19 more columns]

## Sheet: eggs
CHARACTER	1	2	3	4	5	6	7	8	9	10	11	12	13	14	15	16	17	18	19	20	21	22	23	24	25	26	27	28	29	30		CHARACTER	N	RANGE			MEAN	SD
Egg bare diameter	76.48	68.11	85.89	89.34	95.39	63.84	69.55	63.75	78.14	85.96	72.72	84.6	80.06	77.4	77.24																	Egg bare diameter	15	63.75	–	95.39	77.898	9.28977
Egg full diameter	89.48	89.47	106.58	104.39	116.86	89.56	94.07	86.17	95.28	100.61	100.46	103.2	106.12	96.5	98.72																	Egg full diameter	15	86.17	–	116.86	98.498	8.25665
Process height	10.19	15	14.44	10.51	13.31	8.79	15.31	13.25	12.1	8.01	13.64	11.41	10.83	9.53	12.85																	Process height	45	7.63	–	17.33	12.0331	1.99528
	11.07	11.44	17.33	14.58	14.69	7.63	13.2	12.54	9.6	10.53	12.56	10.41	11.83	9.65	12.43																	Process base width	45	9.71	–	20.27	15.45	2.15848
	11.26	12.76	10.05	13.1	13.1	10.95	14.16	12.96	11.36	12.55	12.7	10.97	13.9	10.54	12.47																	Process base/height ratio	45	1.00183	–	1.77278	1.29965	0.171242
Process base width	13.48	18.75	16.91	15.03	19.88	9.71	17.64	14.56	14.67	14.2	15.52	16.73	14.69	13.73	15.53																	Inter-process distance	42	1.34	–	7.75	3.61333	1.55512
	15.8	13.54	20.27	16.97	17.03	11.23	15.73	14.53	14.59	14.17	16.97	16.69	13.67	14.26	13.97																	Number of processes on the egg circumference	15	13	–	16	14.1333	1.0601
	16.12	17.34	16	16.54	16.28	10.97	19.65	14.42	14.81	13.23	16.82	16.84	16.82	15.18	13.78
Process base/height ratio	1.32287	1.25	1.17105	1.43007	1.49361	1.10466	1.15219	1.09887	1.2124	1.77278	1.13783	1.46626	1.35642	1.44071	1.20856
	1.42728	1.18357	1.16965	1.16392	1.15929	1.47182	1.19167	1.15869	1.51979	1.34568	1.35111	1.60327	1.15554	1.47772	1.12389
	1.43162	1.35893	1.59204	1.2626	1.24275	1.00183	1.38771	1.11265	1.3037	1.05418	1.32441	1.5351	1.21007	1.44023	1.10505
Inter-process distance	7.11	6.46	4.43	5.66	3.51	4.04	2.09	4.03	1.6	2.98		1.98	2.57	4.32	4.01
	3.36	3.31	5.06	3.4	5.39	4.3	3.97	3.89	1.64	1.81		1.56	2.64	3.08	3.28
	7.75	5.43	4.11	3.44	5.34	4.28	1.54	4.51	1.34	1.98		2.12	1.58	3.21	3.65
Number of processes on the egg circumference	15	13	14	14	16	16	14	13	13	13	15	15	14	14	13

## Sheet: animals_stats (µm)
Species	Population	Individual	Body length	Buccal tube length	Pharyngeal tube length	Buccopharyngeal tube length	Buccal/pharyngeal tube length ratio	Stylet support insertion point	Buccal tube external width	Buccal tube internal width	Ventral lamina length	Macroplacoid 1	Macroplacoid 2	Macroplacoid 3	Microplacoid	Septulum	Macroplacoid row	Placoid row	Claw 1 external base	Claw 1 external primary branch	Claw 1 external secondary branch	Claw 1 external base/primary branch	Claw 1 internal base	Claw 1 internal primary branch	Claw 1 internal secondary branch	Claw 1 internal base/primary branch	Claw 2 external base	Claw 2 external primary branch	Claw 2 external secondary branch	Claw 2 external base/primary branch	Claw 2 internal base	Claw 2 internal primary branch	Claw 2 internal secondary branch	Claw 2 internal base/primary branch	Claw 3 external base	Claw 3 external primary branch	Claw 3 external secondary branch	Claw 3 external base/primary branch	Claw 3 internal base	Claw 3 internal primary branch	Claw 3 internal secondary branch	Claw 3 internal base/primary branch	Claw 4 anterior base	Claw 4 anterior primary branch	Claw 4 anterior secondary branch	Claw 4 anterior base/primary branch	Claw 4 posterior base	Claw 4 posterior primary branch	Claw 4 posterior secondary branch
Paramacrobiotus fairbanksi	Albania	1 (HOL)	649.14	57.75	#REF!	#REF!	#REF!	43.97	14.19	10.68	34.11	9.26	6.94	10.03	4.78	#REF!	30.24	39.81	#REF!	15.83	11.02	#REF!	#REF!	14.22	11.51	#REF!	#REF!	15.87	12.79	#REF!	#REF!	15.29	12.39	#REF!	#REF!	16.1	13.2	#REF!	#REF!	14.1	11.43	#REF!	#REF!	17.21	13.57	#REF!	#REF!	16.78	13.22
Paramacrobiotus fairbanksi	Albania	2	518.55	51.42	#REF!	#REF!	#REF!	40.82	9.88	8.42	29.8	8.3	6.72	9.81	4.78	#REF!	28.24	35.12	#REF!	12.02	10.16	#REF!	#REF!	13.12	10.35	#REF!	#REF!	16.18	11.55	#REF!	#REF!	13.85	8.61	#REF!	#REF!	14.33	10.81	#REF!	#REF!	12.19		#REF!	#REF!	14.48	11.17	#REF!	#REF!	15.95	11.93
Paramacrobiotus fairbanksi	Albania	3	426.02	31.65	#REF!	#REF!	#REF!	24.64	7.46	5.48	18.17		3.75	5.83	3.45	#REF!	16.81	21.2	#REF!	10.1	7.23	#REF!	#REF!	9.5	6.55	#REF!	#REF!	10.33	8.15	#REF!	#REF!	9.84	8.2	#REF!	#REF!	11.54	8.9	#REF!	#REF!	9.72	7.65	#REF!	#REF!	11.48	8.26	#REF!	#REF!	11.91	7.42
Paramacrobiotus fairbanksi	Albania	4	599.9	53.87	#REF!	#REF!	#REF!	43.55				7.58	7.05	8.96	4.7	#REF!	27.85	37.33	#REF!	13.04	10.09	#REF!	#REF!	13.15	9.94	#REF!	#REF!	16.05	12.43	#REF!	#REF!	13.85	10.59	#REF!	#REF!	15.56	12.99	#REF!	#REF!	14.68	10.94	#REF!	#REF!	14.16	11.01	#REF!	#REF!	15.3	11.16
Paramacrobiotus fairbanksi	Albania	5	445.89	44.88	#REF!	#REF!	#REF!	35.56	9.64	7.97	25.86	6.05	4.94	7.81	3.89	#REF!	23.24	29.6	#REF!	12.11	8.93	#REF!	#REF!	11.19	8.82	#REF!	#REF!	13.51	9.47	#REF!	#REF!	11.01	8.25	#REF!	#REF!	13.36	11.17	#REF!	#REF!	11.97	9.61	#REF!	#REF!	12.92	9.11	#REF!	#REF!	13.09	10.58
Paramacrobiotus fairbanksi	Albania	6	575.88	54.76	#REF!	#REF!	#REF!	43	12.8	10.85	31.5	8.14	6.79	9.1	5.29	#REF!	29.12	37.22	#REF!	15.32	11.84	#REF!	#REF!	13.39	10.92	#REF!	#REF!	15.37	12.38	#REF!	#REF!	13.78	11.56	#REF!	#REF!	15.53	13.55	#REF!	#REF!	14.79	11.62	#REF!	#REF!	16.65	12.94	#REF!	#REF!	17.22	12.91
Paramacrobiotus fairbanksi	Albania	7	479.55	50.59	#REF!	#REF!	#REF!	39.93	10.43	8.17	29.2	8.11	6.49	9.4	5.22	#REF!	25.68	33.45	#REF!	14.26	9.66	#REF!	#REF!	14.32	10.9	#REF!	#REF!	13.73	11.32	#REF!	#REF!	12.99		#REF!	#REF!	14.68	10.18	#REF!	#REF!	13.14	10.12	#REF!	#REF!	16.54	11.48	#REF!	#REF!	15.6	12.39
Paramacrobiotus fairbanksi	Albania	8	637.23	57.81	#REF!	#REF!	#REF!		12.3	9.32		9.53	8.08	11.09	6.27	#REF!			#REF!	14.54	12.1	#REF!	#REF!	17.3	13.67	#REF!	#REF!	18.32	13.3	#REF!	#REF!	16.58	13.75	#REF!	#REF!	18.95	14.3	#REF!	#REF!	15.94	13.13	#REF!	#REF!	19.99	14.43	#REF!	#REF!	20.46	14.2
Paramacrobiotus fairbanksi	Albania	9	532.08	53.81	#REF!	#REF!	#REF!	43.26	10.71	9.09	32.73	7.33	6.63	9.99	4.44	#REF!	27.25	36.8	#REF!	13.42	10.5	#REF!	#REF!	12.98	9.95	#REF!	#REF!	14.74	11.9	#REF!	#REF!	12.84	10.45	#REF!	#REF!	15.36	10.92	#REF!	#REF!	13.83	10.44	#REF!	#REF!	15.27	11.19	#REF!	#REF!	15.65	12.32
Paramacrobiotus fairbanksi	Albania	10	649.14	57.75	#REF!	#REF!	#REF!	43.97	14.19	10.68	34.11	9.26	6.94	10.03	4.78	#REF!	30.24	39.81	#REF!	15.83	11.02	#REF!	#REF!	14.22	11.51	#REF!	#REF!	15.87	12.79	#REF!	#REF!	15.29	12.39	#REF!	#REF!	16.1	13.2	#REF!	#REF!	14.1	11.43	#REF!	#REF!	17.21	13.57	#REF!	#REF!	16.78	13.22
Paramacrobiotus fairbanksi	Albania	11	653.74	56.98	#REF!	#REF!	#REF!	44.77	11.76	9.56	33.65	9.58	8.28	10.56	4.84	#REF!	31.98	40.44	#REF!	14.13	11.56	#REF!	#REF!	13.93	10.94	#REF!	#REF!	16.09	13.29	#REF!	#REF!	14	11.55	#REF!	#REF!	16.91	11.85	#REF!	#REF!	14.58	12.21	#REF!	#REF!	17.09	14.31	#REF!	#REF!	17.66	12.42
Paramacrobiotus fairbanksi	Albania	12	496.25	51.57	#REF!	#REF!	#REF!	40.61	11.05	8.87	29.79	7.87	6.47	8.58	5.24	#REF!	26.72	35.88	#REF!	14.75	11.23	#REF!	#REF!	12.89	10.49	#REF!	#REF!	12.7	10.2	#REF!	#REF!	12.73	9.59	#REF!	#REF!	14.83	12.13	#REF!	#REF!	12.91	9.4	#REF!	#REF!	15.98	11.46	#REF!	#REF!	16.96	12.62
Paramacrobiotus fairbanksi	Albania	13	550.29	54.31	#REF!	#REF!	#REF!	41.9	10.83	9.19	32.67	8.66	7.28	10.56	4.98	#REF!	28.93	37.88	#REF!	16.03	13.21	#REF!	#REF!	14.87	12.61	#REF!	#REF!	15.29	11.89	#REF!	#REF!	13.49	10.55	#REF!	#REF!	15.84	11.38	#REF!	#REF!	13.3	10.87	#REF!	#REF!	15.63	13.11	#REF!	#REF!	15.52	11.8
Paramacrobiotus fairbanksi	Albania	14	512.67	50.26	#REF!	#REF!	#REF!	40.44	9.82	8.18	30.89	7.51	6	9.17	4.28	#REF!	26.12	33.59	#REF!	12.82	9.99	#REF!	#REF!	12.7	10.23	#REF!	#REF!	13.09	10.31	#REF!	#REF!	12.61	10.62	#REF!	#REF!	14.65	10.32	#REF!	#REF!	12.21	11.05	#REF!	#REF!	15.99	11.7	#REF!	#REF!	14.81	12.18
Paramacrobiotus fairbanksi	Albania	15	514.77	52.42	#REF!	#REF!	#REF!	41.6	10.05	8.71	30.38	8.32	6.72	9.55	4.71	#REF!	27.48	35.24	#REF!	13.93	11.21	#REF!	#REF!	13.07	10.91	#REF!	#REF!	14.54	11.13	#REF!	#REF!	14.42	11.74	#REF!	#REF!	16.02	12.55	#REF!	#REF!	14.09	11.88	#REF!	#REF!	15.95	12.54	#REF!	#REF!	16.09	12.79
Paramacrobiotus fairbanksi	Albania	16	543.5	53.88	#REF!	#REF!	#REF!	42.6	11.68	9.21	31.22	7.44	6.84	9.95	5.04	#REF!	27.85	36.49	#REF!	14.75	11.26	#REF!	#REF!	13.21	10.38	#REF!	#REF!	14.97	11.34	#REF!	#REF!	13.81	10.91	#REF!	#REF!	16.82	11	#REF!	#REF!	13.88	11.85	#REF!	#REF!	15.71	10.8	#REF!	#REF!	16.96	13.85
Paramacrobiotus fairbanksi	Albania	17			#REF!	#REF!	#REF!									#REF!			#REF!			#REF!	#REF!			#REF!	#REF!			#REF!	#REF!			#REF!	#REF!			#REF!	#REF!			#REF!	#REF!			#REF!	#REF!
Paramacrobiotus fairbanksi	Albania	18			#REF!	#REF!	#REF!									#REF!			#REF!			#REF!	#REF!			#REF!	#REF!			#REF!	#REF!			#REF!	#REF!			#REF!	#REF!			#REF!	#REF!			#REF!	#REF!
Paramacrobiotus fairbanksi	Albania	19			#REF!	#REF!	#REF!									#REF!			#REF!			#REF!	#REF!			#REF!	#REF!			#REF!	#REF!			#REF!	#REF!			#REF!	#REF!			#REF!	#REF!			#REF!	#REF!
Paramacrobiotus fairbanksi	Albania	20			#REF!	#REF!	#REF!									#REF!			#REF!			#REF!	#REF!			#REF!	#REF!			#REF!	#REF!			#REF!	#REF!			#REF!	#REF!			#REF!	#REF!			#REF!	#REF!
Paramacrobiotus fairbanksi	Albania	21			#REF!	#REF!	#REF!									#REF!			#REF!			#REF!	#REF!			#REF!	#REF!			#REF!	#REF!			#REF!	#REF!			#REF!	#REF!			#REF!	#REF!			#REF!	#REF!
Paramacrobiotus fairbanksi	Albania	22			#REF!	#REF!	#REF!									#REF!			#REF!			#REF!	#REF!			#REF!	#REF!			#REF!	#REF!			#REF!	#REF!			#REF!	#REF!			#REF!	#REF!			#REF!	#REF!
Paramacrobiotus fairbanksi	Albania	23			#REF!	#REF!	#REF!									#REF!			#REF!			#REF!	#REF!			#REF!	#REF!			#REF!	#REF!			#REF!	#REF!			#REF!	#REF!			#REF!	#REF!			#REF!	#REF!
Paramacrobiotus fairbanksi	Albania	24			#REF!	#REF!	#REF!									#REF!			#REF!			#REF!	#REF!			#REF!	#REF!			#REF!	#REF!			#REF!	#REF!			#REF!	#REF!			#REF!	#REF!			#REF!	#REF!
Paramacrobiotus fairbanksi	Albania	25			#REF!	#REF!	#REF!									#REF!			#REF!			#REF!	#REF!			#REF!	#REF!			#REF!	#REF!			#REF!	#REF!			#REF!	#REF!			#REF!	#REF!			#REF!	#REF!
Paramacrobiotus fairbanksi	Albania	26			#REF!	#REF!	#REF!									#REF!			#REF!			#REF!	#REF!			#REF!	#REF!			#REF!	#REF!			#REF!	#REF!			#REF!	#REF!			#REF!	#REF!			#REF!	#REF!
Paramacrobiotus fairbanksi	Albania	27			#REF!	#REF!	#REF!									#REF!			#REF!			#REF!	#REF!			#REF!	#REF!			#REF!	#REF!			#REF!	#REF!			#REF!	#REF!			#REF!	#REF!			#REF!	#REF!
Paramacrobiotus fairbanksi	Albania	28			#REF!	#REF!	#REF!									#REF!			#REF!			#REF!	#REF!			#REF!	#REF!			#REF!	#REF!			#REF!	#REF!			#REF!	#REF!			#REF!	#REF!			#REF!	#REF!
Paramacrobiotus fairbanksi	Albania	29			#REF!	#REF!	#REF!									#REF!			#REF!			#REF!	#REF!			#REF!	#REF!			#REF!	#REF!			#REF!	#REF!			#REF!	#REF!			#REF!	#REF!			#REF!	#REF!
Paramacrobiotus fairbanksi	Albania	30			#REF!	#REF!	#REF!									#REF!			#REF!			#REF!	#REF!			#REF!	#REF!			#REF!	#REF!			#REF!	#REF!			#REF!	#REF!			#REF!	#REF!			#REF!	#REF!
[truncated: 1 more columns]

## Sheet: animals_stats (pt)
Species	Population	Individual	Body length	Pharyngeal tube length	Buccopharyngeal tube length	Stylet support insertion point	Buccal tube external width	Buccal tube internal width	Ventral lamina length	Macroplacoid 1	Macroplacoid 2	Macroplacoid 3	Microplacoid	Septulum	Macroplacoid row	Placoid row	Claw 1 external base	Claw 1 external primary branch	Claw 1 external secondary branch	Claw 1 internal base	Claw 1 internal primary branch	Claw 1 internal secondary branch	Claw 2 external base	Claw 2 external primary branch	Claw 2 external secondary branch	Claw 2 internal base	Claw 2 internal primary branch	Claw 2 internal secondary branch	Claw 3 external base	Claw 3 external primary branch	Claw 3 external secondary branch	Claw 3 internal base	Claw 3 internal primary branch	Claw 3 internal secondary branch	Claw 4 anterior base	Claw 4 anterior primary branch	Claw 4 anterior secondary branch	Claw 4 posterior base	Claw 4 posterior primary branch	Claw 4 posterior secondary branch
Paramacrobiotus fairbanksi	Albania	1 (HOL)	1124.05	#REF!	#REF!	76.1385	24.5714	18.4935	59.0649	16.0346	12.0173	17.368	8.27706	#REF!	52.3636	68.9351	#REF!	27.4113	19.0823	#REF!	24.6234	19.9307	#REF!	27.4805	22.1472	#REF!	26.4762	21.4545	#REF!	27.8788	22.8571	#REF!	24.4156	19.7922	#REF!	29.8009	23.4978	#REF!	29.0563	22.8918
Paramacrobiotus fairbanksi	Albania	2	1008.46	#REF!	#REF!	79.3855	19.2143	16.375	57.9541	16.1416	13.0688	19.0782	9.29599	#REF!	54.9203	68.3003	#REF!	23.3761	19.7588	#REF!	25.5154	20.1284	#REF!	31.4664	22.4621	#REF!	26.935	16.7445	#REF!	27.8685	21.0229	#REF!	23.7067		#REF!	28.1602	21.7231	#REF!	31.0191	23.2011
Paramacrobiotus fairbanksi	Albania	3	1346.03	#REF!	#REF!	77.8515	23.5703	17.3144	57.4092		11.8483	18.4202	10.9005	#REF!	53.1122	66.9826	#REF!	31.9115	22.8436	#REF!	30.0158	20.6951	#REF!	32.6382	25.7504	#REF!	31.09	25.9084	#REF!	36.4613	28.1201	#REF!	30.7109	24.1706	#REF!	36.2717	26.0979	#REF!	37.6303	23.4439
Paramacrobiotus fairbanksi	Albania	4	1113.61	#REF!	#REF!	80.8428				14.0709	13.0871	16.6326	8.72471	#REF!	51.6985	69.2965	#REF!	24.2064	18.7303	#REF!	24.4106	18.4518	#REF!	29.7939	23.0741	#REF!	25.71	19.6584	#REF!	28.8844	24.1136	#REF!	27.2508	20.3081	#REF!	26.2855	20.4381	#REF!	28.4017	20.7165
Paramacrobiotus fairbanksi	Albania	5	993.516	#REF!	#REF!	79.2335	21.4795	17.7585	57.6203	13.4804	11.0071	17.402	8.66756	#REF!	51.7825	65.9537	#REF!	26.9831	19.8975	#REF!	24.9332	19.6524	#REF!	30.1025	21.1007	#REF!	24.5321	18.3824	#REF!	29.7683	24.8886	#REF!	26.6711	21.4127	#REF!	28.7879	20.2986	#REF!	29.1667	23.574
Paramacrobiotus fairbanksi	Albania	6	1051.64	#REF!	#REF!	78.5245	23.3747	19.8137	57.5237	14.8649	12.3996	16.618	9.66034	#REF!	53.1775	67.9693	#REF!	27.9766	21.6216	#REF!	24.4522	19.9416	#REF!	28.0679	22.6077	#REF!	25.1644	21.1103	#REF!	28.3601	24.7443	#REF!	27.0088	21.2199	#REF!	30.4054	23.6304	#REF!	31.4463	23.5756
Paramacrobiotus fairbanksi	Albania	7	947.915	#REF!	#REF!	78.9286	20.6167	16.1494	57.7189	16.0308	12.8286	18.5807	10.3182	#REF!	50.761	66.1198	#REF!	28.1874	19.0947	#REF!	28.306	21.5458	#REF!	27.1398	22.376	#REF!	25.677		#REF!	29.0176	20.1226	#REF!	25.9735	20.004	#REF!	32.6942	22.6922	#REF!	30.8361	24.491
Paramacrobiotus fairbanksi	Albania	8	1102.28	#REF!	#REF!		21.2766	16.1218		16.485	13.9768	19.1835	10.8459	#REF!			#REF!	25.1514	20.9306	#REF!	29.9256	23.6464	#REF!	31.69	23.0064	#REF!	28.6802	23.7848	#REF!	32.7798	24.7362	#REF!	27.5731	22.7123	#REF!	34.5788	24.9611	#REF!	35.3918	24.5632
Paramacrobiotus fairbanksi	Albania	9	988.812	#REF!	#REF!	80.394	19.9034	16.8928	60.8251	13.622	12.3211	18.5653	8.25125	#REF!	50.6411	68.3888	#REF!	24.9396	19.5131	#REF!	24.1219	18.491	#REF!	27.3927	22.1148	#REF!	23.8617	19.4202	#REF!	28.5449	20.2936	#REF!	25.7015	19.4016	#REF!	28.3776	20.7954	#REF!	29.0838	22.8954
Paramacrobiotus fairbanksi	Albania	10	1124.05	#REF!	#REF!	76.1385	24.5714	18.4935	59.0649	16.0346	12.0173	17.368	8.27706	#REF!	52.3636	68.9351	#REF!	27.4113	19.0823	#REF!	24.6234	19.9307	#REF!	27.4805	22.1472	#REF!	26.4762	21.4545	#REF!	27.8788	22.8571	#REF!	24.4156	19.7922	#REF!	29.8009	23.4978	#REF!	29.0563	22.8918
Paramacrobiotus fairbanksi	Albania	11	1147.31	#REF!	#REF!	78.5714	20.6388	16.7778	59.0558	16.8129	14.5314	18.5328	8.49421	#REF!	56.125	70.9723	#REF!	24.7982	20.2878	#REF!	24.4472	19.1997	#REF!	28.238	23.324	#REF!	24.57	20.2703	#REF!	29.6771	20.7968	#REF!	25.5879	21.4286	#REF!	29.993	25.1141	#REF!	30.9933	21.7971
Paramacrobiotus fairbanksi	Albania	12	962.284	#REF!	#REF!	78.7473	21.4272	17.1999	57.7661	15.2608	12.5461	16.6376	10.1609	#REF!	51.8131	69.5753	#REF!	28.6019	21.7762	#REF!	24.9952	20.3413	#REF!	24.6267	19.7789	#REF!	24.6849	18.5961	#REF!	28.757	23.5214	#REF!	25.0339	18.2277	#REF!	30.987	22.2222	#REF!	32.8873	24.4716
Paramacrobiotus fairbanksi	Albania	13	1013.24	#REF!	#REF!	77.1497	19.9411	16.9214	60.1547	15.9455	13.4045	19.4439	9.16958	#REF!	53.2683	69.7477	#REF!	29.5157	24.3233	#REF!	27.3799	23.2186	#REF!	28.1532	21.8928	#REF!	24.8389	19.4255	#REF!	29.1659	20.9538	#REF!	24.489	20.0147	#REF!	28.7792	24.1392	#REF!	28.5767	21.7271
Paramacrobiotus fairbanksi	Albania	14	1020.04	#REF!	#REF!	80.4616	19.5384	16.2754	61.4604	14.9423	11.9379	18.2451	8.51572	#REF!	51.9698	66.8325	#REF!	25.5074	19.8766	#REF!	25.2686	20.3542	#REF!	26.0446	20.5133	#REF!	25.0895	21.1301	#REF!	29.1484	20.5332	#REF!	24.2937	21.9857	#REF!	31.8146	23.2789	#REF!	29.4668	24.234
Paramacrobiotus fairbanksi	Albania	15	982.011	#REF!	#REF!	79.359	19.1721	16.6158	57.955	15.8718	12.8195	18.2182	8.98512	#REF!	52.4227	67.2262	#REF!	26.5738	21.385	#REF!	24.9332	20.8127	#REF!	27.7375	21.2324	#REF!	27.5086	22.396	#REF!	30.5609	23.9412	#REF!	26.8791	22.6631	#REF!	30.4273	23.9222	#REF!	30.6944	24.3991
Paramacrobiotus fairbanksi	Albania	16	1008.72	#REF!	#REF!	79.0646	21.6778	17.0935	57.9436	13.8085	12.6949	18.467	9.35412	#REF!	51.6889	67.7246	#REF!	27.3756	20.8983	#REF!	24.5174	19.265	#REF!	27.784	21.0468	#REF!	25.631	20.2487	#REF!	31.2175	20.4157	#REF!	25.761	21.9933	#REF!	29.1574	20.0445	#REF!	31.4774	25.7053
Paramacrobiotus fairbanksi	Albania	17		#REF!	#REF!									#REF!			#REF!			#REF!			#REF!			#REF!			#REF!			#REF!			#REF!			#REF!
Paramacrobiotus fairbanksi	Albania	18		#REF!	#REF!									#REF!			#REF!			#REF!			#REF!			#REF!			#REF!			#REF!			#REF!			#REF!
Paramacrobiotus fairbanksi	Albania	19		#REF!	#REF!									#REF!			#REF!			#REF!			#REF!			#REF!			#REF!			#REF!			#REF!			#REF!
Paramacrobiotus fairbanksi	Albania	20		#REF!	#REF!									#REF!			#REF!			#REF!			#REF!			#REF!			#REF!			#REF!			#REF!			#REF!
Paramacrobiotus fairbanksi	Albania	21		#REF!	#REF!									#REF!			#REF!			#REF!			#REF!			#REF!			#REF!			#REF!			#REF!			#REF!
Paramacrobiotus fairbanksi	Albania	22		#REF!	#REF!									#REF!			#REF!			#REF!			#REF!			#REF!			#REF!			#REF!			#REF!			#REF!
Paramacrobiotus fairbanksi	Albania	23		#REF!	#REF!									#REF!			#REF!			#REF!			#REF!			#REF!			#REF!			#REF!			#REF!			#REF!
Paramacrobiotus fairbanksi	Albania	24		#REF!	#REF!									#REF!			#REF!			#REF!			#REF!			#REF!			#REF!			#REF!			#REF!			#REF!
Paramacrobiotus fairbanksi	Albania	25		#REF!	#REF!									#REF!			#REF!			#REF!			#REF!			#REF!			#REF!			#REF!			#REF!			#REF!
Paramacrobiotus fairbanksi	Albania	26		#REF!	#REF!									#REF!			#REF!			#REF!			#REF!			#REF!			#REF!			#REF!			#REF!			#REF!
Paramacrobiotus fairbanksi	Albania	27		#REF!	#REF!									#REF!			#REF!			#REF!			#REF!			#REF!			#REF!			#REF!			#REF!			#REF!
Paramacrobiotus fairbanksi	Albania	28		#REF!	#REF!									#REF!			#REF!			#REF!			#REF!			#REF!			#REF!			#REF!			#REF!			#REF!
Paramacrobiotus fairbanksi	Albania	29		#REF!	#REF!									#REF!			#REF!			#REF!			#REF!			#REF!			#REF!			#REF!			#REF!			#REF!
Paramacrobiotus fairbanksi	Albania	30		#REF!	#REF!									#REF!			#REF!			#REF!			#REF!			#REF!			#REF!			#REF!			#REF!			#REF!

## Sheet: eggs_stats (µm)
Species	Population	egg	Egg bare diameter	Egg full diameter	Process height	Process base width	Process base/height ratio	Terminal disc width	Inter-process distance	Number of processes on the egg circumference
Paramacrobiotus fairbanksi	Albania	1	76.48	89.48	10.84	15.1333	1.39392	#REF!	6.07333	15
Paramacrobiotus fairbanksi	Albania	2	68.11	89.47	13.0667	16.5433	1.26417	#REF!	5.06667	13
Paramacrobiotus fairbanksi	Albania	3	85.89	106.58	13.94	17.7267	1.31091	#REF!	4.53333	14
Paramacrobiotus fairbanksi	Albania	4	89.34	104.39	12.73	16.18	1.28553	#REF!	4.16667	14
Paramacrobiotus fairbanksi	Albania	5	95.39	116.86	13.7	17.73	1.29855	#REF!	4.74667	16
Paramacrobiotus fairbanksi	Albania	6	63.84	89.56	9.12333	10.6367	1.19277	#REF!	4.20667	16
Paramacrobiotus fairbanksi	Albania	7	69.55	94.07	14.2233	17.6733	1.24386	#REF!	2.53333	14
Paramacrobiotus fairbanksi	Albania	8	63.75	86.17	12.9167	14.5033	1.1234	#REF!	4.14333	13
Paramacrobiotus fairbanksi	Albania	9	78.14	95.28	11.02	14.69	1.3453	#REF!	1.52667	13
Paramacrobiotus fairbanksi	Albania	10	85.96	100.61	10.3633	13.8667	1.39088	#REF!	2.25667	13
Paramacrobiotus fairbanksi	Albania	11	72.72	100.46	12.9667	16.4367	1.27112	#REF!		15
Paramacrobiotus fairbanksi	Albania	12	84.6	103.2	10.93	16.7533	1.53487	#REF!	1.88667	15
Paramacrobiotus fairbanksi	Albania	13	80.06	106.12	12.1867	15.06	1.24068	#REF!	2.26333	14
Paramacrobiotus fairbanksi	Albania	14	77.4	96.5	9.90667	14.39	1.45289	#REF!	3.53667	14
Paramacrobiotus fairbanksi	Albania	15	77.24	98.72	12.5833	14.4267	1.14584	#REF!	3.64667	13
Paramacrobiotus fairbanksi	Albania	16						#REF!
Paramacrobiotus fairbanksi	Albania	17						#REF!
Paramacrobiotus fairbanksi	Albania	18						#REF!
Paramacrobiotus fairbanksi	Albania	19						#REF!
Paramacrobiotus fairbanksi	Albania	20						#REF!
Paramacrobiotus fairbanksi	Albania	21						#REF!
Paramacrobiotus fairbanksi	Albania	22						#REF!
Paramacrobiotus fairbanksi	Albania	23						#REF!
Paramacrobiotus fairbanksi	Albania	24						#REF!
Paramacrobiotus fairbanksi	Albania	25						#REF!
Paramacrobiotus fairbanksi	Albania	26						#REF!
Paramacrobiotus fairbanksi	Albania	27						#REF!
Paramacrobiotus fairbanksi	Albania	28						#REF!
Paramacrobiotus fairbanksi	Albania	29						#REF!
Paramacrobiotus fairbanksi	Albania	30						#REF!
