# Supplementary material for: Morphological and genetic variability in cosmopolitan tardigrade species - Paramacrobiotus fairbanksi Schill, Förster, Dandekar &amp; Wolf, 2010
Source: Research Square preprint supplement (doi:10.21203/rs.3.rs-2736709/v2), 2023-07-17
Supplement: Supplementary file 6 [file db3de366ebc91c8d03fd308e.xlsx]

## Sheet: instructions
	INSTRUCTIONS and TERMS OF USE
	1	This is a morphometric template for species of the Tardigrada Order Parachela.
	2	The template caluclates the pt ratio and other relative measures only if all measurements required to calculate a ratio are provided (otherwise the ratio cell remains empty, meaning lack of data). The only numbers you need to enter are absolute measurements in micrometres [μm] in the sheet "individuals". If a structure is not measurable leave the cell empty (enetring zeros will mean that the trai…
	3	The "individuals" sheet automatically calculates basic statistics (number of measurements, range, mean and SD). The table with these statistics is placed after the last (30th) specimen. The summary table can be then copied and pasted directly to MS Word.
	4	If measurements are done on the type series, please enter the holotype in the first column (this way holotype data are automatically copied to the summary table at end of the sheet). If measurements are not done on the type series, you may delete the last two columns in the summary table. You may change specimen/slide names as desired.
	5	If a trait listed is not present in the species you are measuring, remove the entire row (highlight the row, right mouse click, choose "delete").
	6	Data from the sheet "individuals" are automatically copied to the four remaining "stats" sheets. Data in those sheets are arranged for statistical analyses in the majority of statistical software.
	7	If you want to see the formulas behind this template, press Ctrl+` (usually just before "1" on the keyboard). To return to the value view, press Ctrl+` again.
	8	This template can be freely used but each published use must be credited as Morphometric data were handled using the Parachela ver. 1.8 template available from the Tardigrada Register, www.tardigrada.net/register (Michalczyk & Kaczmarek 2013). The reference is: Michalczyk, Ł. & Kaczmarek, Ł. (2013) The Tardigrada Register: a comprehensive online data repository for tardigrade taxonomy. Journal of…
	9	Copyright by Łukasz Michalczyk. Enquires and suggestions: LM@tardigrada.net

## Sheet: general info
	Species		Paramacrobiotus fairbanksi
	Population		Madeira
	Type series		No
	Author		Pushpalata Kayastha
	Date		21.02.2021

## Sheet: animals
SPECIMEN	1 (HOL)		2		3		4		5		6		7		8		9		10		11		12		13		14		15		16		17		18		19		20		21		22		23		24		25
CHARACTER	µm	pt	µm	pt	µm	pt	µm	pt	µm	pt	µm	pt	µm	pt	µm	pt	µm	pt	µm	pt	µm	pt	µm	pt	µm	pt	µm	pt	µm	pt	µm	pt	µm	pt	µm	pt	µm	pt	µm	pt	µm	pt	µm	pt	µm	pt	µm	pt	µm
Body length			953.53	1396.3	1036.32	1495.84	501.21	987.606	731.37	1199.75	601.38	1118.64	791.42	1216.63	752.24	1261.94	475.58	963.688	484.82	979.434	563.33	1093	854.91	1394.86	745.66	1187.92	769.92	1144.18	580.1	1067.73	870.18	1313.28
Buccopharyngeal tube
Buccal tube length		–	68.29	–	69.28	–	50.75	–	60.96	–	53.76	–	65.05	–	59.61	–	49.35	–	49.5	–	51.54	–	61.29	–	62.77	–	67.29	–	54.33	–	66.26	–		–		–		–		–		–		–		–		–
Stylet support insertion point			53.8	78.7817	53.79	77.6415	40.26	79.33	46.91	76.9521	42.88	79.7619	50.49	77.6172	48.51	81.379	38.26	77.5279	37.88	76.5253	39.19	76.038	47.69	77.8104	49.71	79.1939	51.2	76.0886	43.39	79.8638	51.64	77.9354
Buccal tube external width			15.95	23.3563	16.36	23.6143	11.49	22.6404	15.22	24.9672	12.21	22.7121	14.74	22.6595	14.35	24.0731	10.36	20.9929	10.61	21.4343	11.01	21.362	15.67	25.567	16.23	25.8563	14.15	21.0284	12.66	23.302	16.47	24.8566
Buccal tube internal width			11.2	16.4006	12.16	17.552	8.1	15.9606	10.57	17.3392	8.46	15.7366	11.28	17.3405	10.24	17.1783	7.02	14.2249	6.96	14.0606	7.51	14.5712	11.03	17.9964	12.02	19.1493	10.57	15.7081	8.31	15.2954	12.01	18.1256
Ventral lamina length			39.61	58.0026			29.75	58.6207	35.31	57.9232	32.12	59.747	36.59	56.249	36.24	60.7952	29.46	59.696	29.52	59.6364			35.41	57.7745	38.14	60.7615	37.28	55.402	31.79	58.5128	39.33	59.3571
Placoid lengths
Macroplacoid 1			13.78	20.1786	14.1	20.3522	9.08	17.8916	12.27	20.128	9.15	17.0201	13.58	20.8762	11.57	19.4095	8.26	16.7376	9.07	18.3232	8.73	16.9383	13.37	21.8143	12.95	20.6309	13.01	19.3342	10.2	18.7742	13.53	20.4196
Macroplacoid 2			10.92	15.9906	13.19	19.0387	7.59	14.9557	11.04	18.1102	8.03	14.9368	12.41	19.0776	9.97	16.7254	7.73	15.6636	8.29	16.7475	7.91	15.3473	10.46	17.0664	11.06	17.6199	11.19	16.6295	9.23	16.9888	11.9	17.9596
Macroplacoid 3			16.37	23.9713	16.51	23.8308	10.34	20.3744	13.68	22.4409	10.27	19.1034	15.29	23.505	13.48	22.6137	10.34	20.9524	10.33	20.8687	8.63	16.7443	14.62	23.8538	14.59	23.2436	14.33	21.2959	11.4	20.9829	15.61	23.5587
Microplacoid			5.4	7.90745	5.94	8.5739	3.8	7.48768	4.07	6.67651	3.24	6.02679	4.7	7.22521	4.21	7.06257	3.29	6.66667	3.42	6.90909	4.39	8.51766	3.91	6.37951	3.94	6.27688	4.2	6.24164	3.41	6.27646	4.3	6.48959
Macroplacoid row			44.93	65.7929	45.85	66.1807	32.3	63.6453	39.22	64.3373	34.08	63.3929	44.52	68.4397	37.97	63.6974	31.36	63.5461	31.3	63.2323	30.95	60.0504	41.46	67.6456	41.92	66.7835	45.18	67.1422	33.78	62.1756	47.52	71.7175
Placoid row			58.47	85.6201	60.14	86.8072	42.03	82.8177	51.45	84.3996	43.07	80.1153	56.2	86.3951	48.74	81.7648	40.47	82.0061	40.39	81.596	40.63	78.832	53.12	86.6699	52.93	84.3237	57.91	86.0603	42.81	78.7962	55.84	84.2741
Claw I heights
External primary branch			21.79	31.908	19.52	28.1755	14.14	27.8621	19.29	31.6437	15.48	28.7946	20.22	31.0838	18.61	31.2196	14.56	29.5035	13.8	27.8788	15.89	30.8304	19.14	31.2286	19.38	30.8746	19.09	28.3697	16.96	31.2166	19.05	28.7504
External secondary branch			15.72	23.0195	14.8	21.3626	9.49	18.6995	14.09	23.1135	11.54	21.4658	13.34	20.5073	13.05	21.8923	10.85	21.9858	12.5	25.2525	11.42	22.1575	14.64	23.8864	13.46	21.4434	14.12	20.9838	12.7	23.3757	12.23	18.4576
Internal primary branch			19.52	28.584	19.03	27.4682	13.38	26.3645	17.09	28.0348	13.89	25.8371	17.52	26.9331	16.3	27.3444	13.46	27.2746	13.87	28.0202	14.9	28.9096	15.49	25.2733	19.56	31.1614	16.55	24.595	14.97	27.5538	18.83	28.4184
Internal secondary branch			15.54	22.7559	15.55	22.4452	9.96	19.6256	14.53	23.8353	10.82	20.1265	14.22	21.8601	14.21	23.8383	10.96	22.2087	11.11	22.4444	10.91	21.168	13.37	21.8143	15.52	24.7252	12.1	17.9819	12.35	22.7315	15.99	24.1322
Claw II heights
External primary branch			22.3	32.6549	19.71	28.4498	15.03	29.6158	19.51	32.0046	16.86	31.3616	20.76	31.9139	18.95	31.79	14.22	28.8146	15.49	31.2929	16.12	31.2767	19.29	31.4733	18.16	28.931	21.2	31.5054	16.06	29.5601	20.76	31.3311
External secondary branch			17.32	25.3624	15.55	22.4452	11.79	23.2315	16.04	26.3123	12.35	22.9725	15.86	24.3812	13.87	23.2679	13.12	26.5856	12.37	24.9899	13.89	26.9499	15.68	25.5833	15.49	24.6774	16.07	23.8817	12.33	22.6946	17.38	26.23
Internal primary branch			20.42	29.9019	19.01	27.4394	13.92	27.4286	17.88	29.3307	14.5	26.9717	17.8	27.3636	17	28.5187	14.2	28.7741	14.39	29.0707	14.53	28.1917	19.48	31.7833	19.56	31.1614	18.52	27.5227	14.94	27.4986	17.55	26.4866
Internal secondary branch			17.6	25.7724	15.25	22.0121	10.93	21.5369	14.8	24.2782	11.07	20.5915	14.4	22.1368	13.7	22.9827	10.15	20.5674	11.97	24.1818	11.83	22.953	15.15	24.7186	15.97	25.4421	15.62	23.213	11.44	21.0565	14.7	22.1853
Claw III heights
External primary branch			20.52	30.0483	19.31	27.8724	15.47	30.4828	18.36	30.1181	14.93	27.7716	21.4	32.8978	19.34	32.4442	15.31	31.0233	16.15	32.6263	15.69	30.4424	19.24	31.3917	19.63	31.2729	16.45	24.4464	16.47	30.3147	18.94	28.5844
External secondary branch			16.29	23.8542	14.62	21.1028	12.07	23.7833	14.64	24.0157	11.64	21.6518	16.15	24.8271	16.49	27.6631	12.86	26.0588	12.54	25.3333	12.8	24.8351	16.1	26.2686	15.65	24.9323	13.51	20.0773	13.47	24.7929	16.32	24.6302
Internal primary branch			17.41	25.4942	21.22	30.6293	14.03	27.6453	17.38	28.5105	14.48	26.9345	19.07	29.3159	18.3	30.6995	14.74	29.8683	13.98	28.2424	15.1	29.2976	20.31	33.1375	18.76	29.8869	18.06	26.8391	16.17	29.7626	20.64	31.15
Internal secondary branch			20.99	30.7366	14.97	21.608	11.55	22.7586	12.79	20.981	12.08	22.4702	16.01	24.6118	15.19	25.4823	10.99	22.2695	11.5	23.2323	11.82	22.9336	14.94	24.3759	15.13	24.1039	16.42	24.4018	12.02	22.1241	16.45	24.8264
Claw IV heights
Anterior primary branch			23.08	33.797	23.19	33.4729	17.03	33.5567	22.24	36.4829	17.65	32.8311	20.79	31.96	19.15	32.1255	16.74	33.921	17.97	36.303	17.85	34.6333	23.06	37.6244	19.91	31.719	21.89	32.5308	18.52	34.088	22.78	34.3797
Anterior secondary branch			15.96	23.3709	18.6	26.8476	14.03	27.6453	16.1	26.4108	13.56	25.2232	16.91	25.9954	15.05	25.2474	12.24	24.8024	14.14	28.5657	13.97	27.1052	18.06	29.4665	15.7	25.0119	17.8	26.4527	15.47	28.4741	15.18	22.9097
Posterior primary branch			22.22	32.5377	22.13	31.9428	14.63	28.8276	19.57	32.103	16.35	30.4129	21	32.2829	18.39	30.8505	15.22	30.8409	16.65	33.6364	16.33	31.6841	21.75	35.487	20.63	32.866	20.78	30.8813	18.35	33.7751	21.74	32.8101
Posterior secondary branch			17.69	25.9042	18.11	26.1403	10.33	20.3547	14.89	24.4259	12.62	23.4747	15.9	24.4427	15.47	25.952	11.83	23.9716	11.88	24	11.94	23.1665	16.07	26.2196	15.44	24.5977	16.03	23.8223	13.26	24.4064	17.32	26.1395
Eyes (0 = absent; 1 = present)			0		0		0		0		0		0		0		0		0		0		0		0		0		0		0
Cuticular pores (0/1)			0		0		0		0		0		0		0		0		0		0		0		0		0		0		0
Lunules I with teeth (0/1)			0		0		0		0		0		0		0		0		0		0		0		0		0		0		0
Lunules II with teeth (0/1)			0		0		0		0		0		0		0		0		0		0		0		0		0		0		0
Lunules III with teeth (0/1)			0		0		0		0		0		0		0		0		0		0		0		0		0		0		0
Lunules IV with teeth (0/1)			0		0		0		0		0		0		0		0		0		0		0		0		0		0		0
Granulation on legs I (0/1)			1		1		1		1		1		1		1		1		1		1		1		1		1		1		1
Granulation on legs II (0/1)			1		1		1		1		1		1		1		1		1		1		1		1		1		1		1
Granulation on legs III (0/1)			1		1		1		1		1		1		1		1		1		1		1		1		1		1		1
Granulation on legs IV (0/1)			1		1		1		1		1		1		1		1		1		1		1		1		1		1		1
[truncated: 19 more columns]

## Sheet: eggs
CHARACTER	1	2	3	4	5	6	7	8	9	10	11	12	13	14	15	16	17	18	19	20	21	22	23	24	25	26	27	28	29	30		CHARACTER	N	RANGE			MEAN	SD
Egg bare diameter	80.89	83.41	79.67	97.61	84.37	78.3	75.19	90.34	81.87	74.88	85.37	86.73	75.17	80.77	88.76																	Egg bare diameter	15	74.88	–	97.61	82.8887	6.29066
Egg full diameter	108.54	116.14	117.7	141.69	118.66	112.72	117.14	124.62	113.18	110.9	112.71	122.24	107.65	118.74	120.15																	Egg full diameter	15	107.65	–	141.69	117.519	8.2616
Process height	16.37	14.54	19.55	22.98	16.58	16.49	17.32	19.79	14.93	13.65	15	17.79	16.39	16.56	19.13																	Process height	43	13.65	–	22.98	17.7012	2.23885
	17.43	15.91	17.35	22.78	15.55	17.92	18.79	19.46	17.6	15.6	14.66	18.65		20.34	18.94																	Process base width	43	15.1	–	23.83	18.7173	2.03493
	17.72	17.21	18.44	21.86	17.58	17.99	20.96	20.71	19.88	14.31	14.95	17.07		17.16	17.26																	Process base/height ratio	43	0.926542	–	1.25421	1.06311	0.087247
Process base width	19.45	15.1	20.36	23.83	17.6	18.91	18.25	22.74	16.92	17.12	17.03	18.08	16.41	17.72	18.26																	Inter-process distance	44	3	–	6.19	4.5825	0.745639
	17.38	16.53	19.25	22.38	17.41	21.07	18.22	20.53	19.643	19.07	16.23	17.28		23.5	18.46																	Number of processes on the egg circumference	15	11	–	14	12.4	0.910259
	16.58	16.22	18.01	20.41	19.03	19.3	20.5	21.67	19.56	17.86	17.12	16.89		19.2	17.76
Process base/height ratio	1.18815	1.03851	1.04143	1.03699	1.06152	1.14676	1.0537	1.14907	1.13329	1.25421	1.13533	1.0163	1.00122	1.07005	0.954522
	0.997131	1.03897	1.10951	0.982441	1.11961	1.17578	0.969665	1.05498	1.11608	1.22244	1.10709	0.926542		1.15536	0.974657
	0.935666	0.942475	0.976681	0.933669	1.08248	1.07282	0.978053	1.04635	0.983903	1.24808	1.14515	0.989455		1.11888	1.02897
Inter-process distance	4.55	3.74	5.52	4.46	4.09	4.95	5.41	4.85	4.5	3.77	5.16	5.2	3.25	5.55	3.92
	3.57	4.91	4.82	6.19	5.09	3.9	4.07	5.21	3.98	5.13	3	4.87	3.54	5.5	3.87
	4.74	4.4	3.96	5.18	3.84	5.62	5.45	5.7	3.99	4.4	3.63	4.62		4.71	4.82
Number of processes on the egg circumference	13	12	12	14	12	13	12	11	13	12	13	11	14	12	12

## Sheet: animals (µm)
Species	Population	Individual	Body length	Buccal tube length	Pharyngeal tube length	Buccopharyngeal tube length	Buccal/pharyngeal tube length ratio	Stylet support insertion point	Buccal tube external width	Buccal tube internal width	Ventral lamina length	Macroplacoid 1	Macroplacoid 2	Macroplacoid 3	Microplacoid	Septulum	Macroplacoid row	Placoid row	Claw I external base	Claw I external primary branch	Claw I external secondary branch	Claw I external base/primary branch	Claw I internal base	Claw I internal primary branch	Claw I internal secondary branch	Claw I internal base/primary branch	Claw II external base	Claw II external primary branch	Claw II external secondary branch	Claw II external base/primary branch	Claw II internal base	Claw II internal primary branch	Claw II internal secondary branch	Claw II internal base/primary branch	Claw III external base	Claw III external primary branch	Claw III external secondary branch	Claw III external base/primary branch	Claw III internal base	Claw III internal primary branch	Claw III internal secondary branch	Claw III internal base/primary branch	Claw IV anterior base	Claw IV anterior primary branch	Claw IV anterior secondary branch	Claw IV anterior base/primary branch	Claw IV posterior base	Claw IV posterior primary branch	Claw IV posterior secondary branch
Paramacrobiotus fairbanksi	Madeira	1 (HOL)			#REF!	#REF!	#REF!									#REF!			#REF!			#REF!	#REF!			#REF!	#REF!			#REF!	#REF!			#REF!	#REF!			#REF!	#REF!			#REF!	#REF!			#REF!	#REF!
Paramacrobiotus fairbanksi	Madeira	2	953.53	68.29	#REF!	#REF!	#REF!	53.8	15.95	11.2	39.61	13.78	10.92	16.37	5.4	#REF!	44.93	58.47	#REF!	21.79	15.72	#REF!	#REF!	19.52	15.54	#REF!	#REF!	22.3	17.32	#REF!	#REF!	20.42	17.6	#REF!	#REF!	20.52	16.29	#REF!	#REF!	17.41	20.99	#REF!	#REF!	23.08	15.96	#REF!	#REF!	22.22	17.69
Paramacrobiotus fairbanksi	Madeira	3	1036.32	69.28	#REF!	#REF!	#REF!	53.79	16.36	12.16		14.1	13.19	16.51	5.94	#REF!	45.85	60.14	#REF!	19.52	14.8	#REF!	#REF!	19.03	15.55	#REF!	#REF!	19.71	15.55	#REF!	#REF!	19.01	15.25	#REF!	#REF!	19.31	14.62	#REF!	#REF!	21.22	14.97	#REF!	#REF!	23.19	18.6	#REF!	#REF!	22.13	18.11
Paramacrobiotus fairbanksi	Madeira	4	501.21	50.75	#REF!	#REF!	#REF!	40.26	11.49	8.1	29.75	9.08	7.59	10.34	3.8	#REF!	32.3	42.03	#REF!	14.14	9.49	#REF!	#REF!	13.38	9.96	#REF!	#REF!	15.03	11.79	#REF!	#REF!	13.92	10.93	#REF!	#REF!	15.47	12.07	#REF!	#REF!	14.03	11.55	#REF!	#REF!	17.03	14.03	#REF!	#REF!	14.63	10.33
Paramacrobiotus fairbanksi	Madeira	5	731.37	60.96	#REF!	#REF!	#REF!	46.91	15.22	10.57	35.31	12.27	11.04	13.68	4.07	#REF!	39.22	51.45	#REF!	19.29	14.09	#REF!	#REF!	17.09	14.53	#REF!	#REF!	19.51	16.04	#REF!	#REF!	17.88	14.8	#REF!	#REF!	18.36	14.64	#REF!	#REF!	17.38	12.79	#REF!	#REF!	22.24	16.1	#REF!	#REF!	19.57	14.89
Paramacrobiotus fairbanksi	Madeira	6	601.38	53.76	#REF!	#REF!	#REF!	42.88	12.21	8.46	32.12	9.15	8.03	10.27	3.24	#REF!	34.08	43.07	#REF!	15.48	11.54	#REF!	#REF!	13.89	10.82	#REF!	#REF!	16.86	12.35	#REF!	#REF!	14.5	11.07	#REF!	#REF!	14.93	11.64	#REF!	#REF!	14.48	12.08	#REF!	#REF!	17.65	13.56	#REF!	#REF!	16.35	12.62
Paramacrobiotus fairbanksi	Madeira	7	791.42	65.05	#REF!	#REF!	#REF!	50.49	14.74	11.28	36.59	13.58	12.41	15.29	4.7	#REF!	44.52	56.2	#REF!	20.22	13.34	#REF!	#REF!	17.52	14.22	#REF!	#REF!	20.76	15.86	#REF!	#REF!	17.8	14.4	#REF!	#REF!	21.4	16.15	#REF!	#REF!	19.07	16.01	#REF!	#REF!	20.79	16.91	#REF!	#REF!	21	15.9
Paramacrobiotus fairbanksi	Madeira	8	752.24	59.61	#REF!	#REF!	#REF!	48.51	14.35	10.24	36.24	11.57	9.97	13.48	4.21	#REF!	37.97	48.74	#REF!	18.61	13.05	#REF!	#REF!	16.3	14.21	#REF!	#REF!	18.95	13.87	#REF!	#REF!	17	13.7	#REF!	#REF!	19.34	16.49	#REF!	#REF!	18.3	15.19	#REF!	#REF!	19.15	15.05	#REF!	#REF!	18.39	15.47
Paramacrobiotus fairbanksi	Madeira	9	475.58	49.35	#REF!	#REF!	#REF!	38.26	10.36	7.02	29.46	8.26	7.73	10.34	3.29	#REF!	31.36	40.47	#REF!	14.56	10.85	#REF!	#REF!	13.46	10.96	#REF!	#REF!	14.22	13.12	#REF!	#REF!	14.2	10.15	#REF!	#REF!	15.31	12.86	#REF!	#REF!	14.74	10.99	#REF!	#REF!	16.74	12.24	#REF!	#REF!	15.22	11.83
Paramacrobiotus fairbanksi	Madeira	10	484.82	49.5	#REF!	#REF!	#REF!	37.88	10.61	6.96	29.52	9.07	8.29	10.33	3.42	#REF!	31.3	40.39	#REF!	13.8	12.5	#REF!	#REF!	13.87	11.11	#REF!	#REF!	15.49	12.37	#REF!	#REF!	14.39	11.97	#REF!	#REF!	16.15	12.54	#REF!	#REF!	13.98	11.5	#REF!	#REF!	17.97	14.14	#REF!	#REF!	16.65	11.88
Paramacrobiotus fairbanksi	Madeira	11	563.33	51.54	#REF!	#REF!	#REF!	39.19	11.01	7.51		8.73	7.91	8.63	4.39	#REF!	30.95	40.63	#REF!	15.89	11.42	#REF!	#REF!	14.9	10.91	#REF!	#REF!	16.12	13.89	#REF!	#REF!	14.53	11.83	#REF!	#REF!	15.69	12.8	#REF!	#REF!	15.1	11.82	#REF!	#REF!	17.85	13.97	#REF!	#REF!	16.33	11.94
Paramacrobiotus fairbanksi	Madeira	12	854.91	61.29	#REF!	#REF!	#REF!	47.69	15.67	11.03	35.41	13.37	10.46	14.62	3.91	#REF!	41.46	53.12	#REF!	19.14	14.64	#REF!	#REF!	15.49	13.37	#REF!	#REF!	19.29	15.68	#REF!	#REF!	19.48	15.15	#REF!	#REF!	19.24	16.1	#REF!	#REF!	20.31	14.94	#REF!	#REF!	23.06	18.06	#REF!	#REF!	21.75	16.07
Paramacrobiotus fairbanksi	Madeira	13	745.66	62.77	#REF!	#REF!	#REF!	49.71	16.23	12.02	38.14	12.95	11.06	14.59	3.94	#REF!	41.92	52.93	#REF!	19.38	13.46	#REF!	#REF!	19.56	15.52	#REF!	#REF!	18.16	15.49	#REF!	#REF!	19.56	15.97	#REF!	#REF!	19.63	15.65	#REF!	#REF!	18.76	15.13	#REF!	#REF!	19.91	15.7	#REF!	#REF!	20.63	15.44
Paramacrobiotus fairbanksi	Madeira	14	769.92	67.29	#REF!	#REF!	#REF!	51.2	14.15	10.57	37.28	13.01	11.19	14.33	4.2	#REF!	45.18	57.91	#REF!	19.09	14.12	#REF!	#REF!	16.55	12.1	#REF!	#REF!	21.2	16.07	#REF!	#REF!	18.52	15.62	#REF!	#REF!	16.45	13.51	#REF!	#REF!	18.06	16.42	#REF!	#REF!	21.89	17.8	#REF!	#REF!	20.78	16.03
Paramacrobiotus fairbanksi	Madeira	15	580.1	54.33	#REF!	#REF!	#REF!	43.39	12.66	8.31	31.79	10.2	9.23	11.4	3.41	#REF!	33.78	42.81	#REF!	16.96	12.7	#REF!	#REF!	14.97	12.35	#REF!	#REF!	16.06	12.33	#REF!	#REF!	14.94	11.44	#REF!	#REF!	16.47	13.47	#REF!	#REF!	16.17	12.02	#REF!	#REF!	18.52	15.47	#REF!	#REF!	18.35	13.26
Paramacrobiotus fairbanksi	Madeira	16	870.18	66.26	#REF!	#REF!	#REF!	51.64	16.47	12.01	39.33	13.53	11.9	15.61	4.3	#REF!	47.52	55.84	#REF!	19.05	12.23	#REF!	#REF!	18.83	15.99	#REF!	#REF!	20.76	17.38	#REF!	#REF!	17.55	14.7	#REF!	#REF!	18.94	16.32	#REF!	#REF!	20.64	16.45	#REF!	#REF!	22.78	15.18	#REF!	#REF!	21.74	17.32
Paramacrobiotus fairbanksi	Madeira	17			#REF!	#REF!	#REF!									#REF!			#REF!			#REF!	#REF!			#REF!	#REF!			#REF!	#REF!			#REF!	#REF!			#REF!	#REF!			#REF!	#REF!			#REF!	#REF!
Paramacrobiotus fairbanksi	Madeira	18			#REF!	#REF!	#REF!									#REF!			#REF!			#REF!	#REF!			#REF!	#REF!			#REF!	#REF!			#REF!	#REF!			#REF!	#REF!			#REF!	#REF!			#REF!	#REF!
Paramacrobiotus fairbanksi	Madeira	19			#REF!	#REF!	#REF!									#REF!			#REF!			#REF!	#REF!			#REF!	#REF!			#REF!	#REF!			#REF!	#REF!			#REF!	#REF!			#REF!	#REF!			#REF!	#REF!
Paramacrobiotus fairbanksi	Madeira	20			#REF!	#REF!	#REF!									#REF!			#REF!			#REF!	#REF!			#REF!	#REF!			#REF!	#REF!			#REF!	#REF!			#REF!	#REF!			#REF!	#REF!			#REF!	#REF!
Paramacrobiotus fairbanksi	Madeira	21			#REF!	#REF!	#REF!									#REF!			#REF!			#REF!	#REF!			#REF!	#REF!			#REF!	#REF!			#REF!	#REF!			#REF!	#REF!			#REF!	#REF!			#REF!	#REF!
Paramacrobiotus fairbanksi	Madeira	22			#REF!	#REF!	#REF!									#REF!			#REF!			#REF!	#REF!			#REF!	#REF!			#REF!	#REF!			#REF!	#REF!			#REF!	#REF!			#REF!	#REF!			#REF!	#REF!
Paramacrobiotus fairbanksi	Madeira	23			#REF!	#REF!	#REF!									#REF!			#REF!			#REF!	#REF!			#REF!	#REF!			#REF!	#REF!			#REF!	#REF!			#REF!	#REF!			#REF!	#REF!			#REF!	#REF!
Paramacrobiotus fairbanksi	Madeira	24			#REF!	#REF!	#REF!									#REF!			#REF!			#REF!	#REF!			#REF!	#REF!			#REF!	#REF!			#REF!	#REF!			#REF!	#REF!			#REF!	#REF!			#REF!	#REF!
Paramacrobiotus fairbanksi	Madeira	25			#REF!	#REF!	#REF!									#REF!			#REF!			#REF!	#REF!			#REF!	#REF!			#REF!	#REF!			#REF!	#REF!			#REF!	#REF!			#REF!	#REF!			#REF!	#REF!
Paramacrobiotus fairbanksi	Madeira	26			#REF!	#REF!	#REF!									#REF!			#REF!			#REF!	#REF!			#REF!	#REF!			#REF!	#REF!			#REF!	#REF!			#REF!	#REF!			#REF!	#REF!			#REF!	#REF!
Paramacrobiotus fairbanksi	Madeira	27			#REF!	#REF!	#REF!									#REF!			#REF!			#REF!	#REF!			#REF!	#REF!			#REF!	#REF!			#REF!	#REF!			#REF!	#REF!			#REF!	#REF!			#REF!	#REF!
Paramacrobiotus fairbanksi	Madeira	28			#REF!	#REF!	#REF!									#REF!			#REF!			#REF!	#REF!			#REF!	#REF!			#REF!	#REF!			#REF!	#REF!			#REF!	#REF!			#REF!	#REF!			#REF!	#REF!
Paramacrobiotus fairbanksi	Madeira	29			#REF!	#REF!	#REF!									#REF!			#REF!			#REF!	#REF!			#REF!	#REF!			#REF!	#REF!			#REF!	#REF!			#REF!	#REF!			#REF!	#REF!			#REF!	#REF!
Paramacrobiotus fairbanksi	Madeira	30			#REF!	#REF!	#REF!									#REF!			#REF!			#REF!	#REF!			#REF!	#REF!			#REF!	#REF!			#REF!	#REF!			#REF!	#REF!			#REF!	#REF!			#REF!	#REF!
[truncated: 1 more columns]

## Sheet: animals (pt)
Species	Population	Individual	Body length	Pharyngeal tube length	Buccopharyngeal tube length	Stylet support insertion point	Buccal tube external width	Buccal tube internal width	Ventral lamina length	Macroplacoid 1	Macroplacoid 2	Macroplacoid 3	Microplacoid	Septulum	Macroplacoid row	Placoid row	Claw I external base	Claw I external primary branch	Claw I external secondary branch	Claw I internal base	Claw I internal primary branch	Claw I internal secondary branch	Claw II external base	Claw II external primary branch	Claw II external secondary branch	Claw II internal base	Claw II internal primary branch	Claw II internal secondary branch	Claw III external base	Claw III external primary branch	Claw III external secondary branch	Claw III internal base	Claw III internal primary branch	Claw III internal secondary branch	Claw IV anterior base	Claw IV anterior primary branch	Claw IV anterior secondary branch	Claw IV posterior base	Claw IV posterior primary branch	Claw IV posterior secondary branch
Paramacrobiotus fairbanksi	Madeira	1 (HOL)		#REF!	#REF!									#REF!			#REF!			#REF!			#REF!			#REF!			#REF!			#REF!			#REF!			#REF!
Paramacrobiotus fairbanksi	Madeira	2	1396.3	#REF!	#REF!	78.7817	23.3563	16.4006	58.0026	20.1786	15.9906	23.9713	7.90745	#REF!	65.7929	85.6201	#REF!	31.908	23.0195	#REF!	28.584	22.7559	#REF!	32.6549	25.3624	#REF!	29.9019	25.7724	#REF!	30.0483	23.8542	#REF!	25.4942	30.7366	#REF!	33.797	23.3709	#REF!	32.5377	25.9042
Paramacrobiotus fairbanksi	Madeira	3	1495.84	#REF!	#REF!	77.6415	23.6143	17.552		20.3522	19.0387	23.8308	8.5739	#REF!	66.1807	86.8072	#REF!	28.1755	21.3626	#REF!	27.4682	22.4452	#REF!	28.4498	22.4452	#REF!	27.4394	22.0121	#REF!	27.8724	21.1028	#REF!	30.6293	21.608	#REF!	33.4729	26.8476	#REF!	31.9428	26.1403
Paramacrobiotus fairbanksi	Madeira	4	987.606	#REF!	#REF!	79.33	22.6404	15.9606	58.6207	17.8916	14.9557	20.3744	7.48768	#REF!	63.6453	82.8177	#REF!	27.8621	18.6995	#REF!	26.3645	19.6256	#REF!	29.6158	23.2315	#REF!	27.4286	21.5369	#REF!	30.4828	23.7833	#REF!	27.6453	22.7586	#REF!	33.5567	27.6453	#REF!	28.8276	20.3547
Paramacrobiotus fairbanksi	Madeira	5	1199.75	#REF!	#REF!	76.9521	24.9672	17.3392	57.9232	20.128	18.1102	22.4409	6.67651	#REF!	64.3373	84.3996	#REF!	31.6437	23.1135	#REF!	28.0348	23.8353	#REF!	32.0046	26.3123	#REF!	29.3307	24.2782	#REF!	30.1181	24.0157	#REF!	28.5105	20.981	#REF!	36.4829	26.4108	#REF!	32.103	24.4259
Paramacrobiotus fairbanksi	Madeira	6	1118.64	#REF!	#REF!	79.7619	22.7121	15.7366	59.747	17.0201	14.9368	19.1034	6.02679	#REF!	63.3929	80.1153	#REF!	28.7946	21.4658	#REF!	25.8371	20.1265	#REF!	31.3616	22.9725	#REF!	26.9717	20.5915	#REF!	27.7716	21.6518	#REF!	26.9345	22.4702	#REF!	32.8311	25.2232	#REF!	30.4129	23.4747
Paramacrobiotus fairbanksi	Madeira	7	1216.63	#REF!	#REF!	77.6172	22.6595	17.3405	56.249	20.8762	19.0776	23.505	7.22521	#REF!	68.4397	86.3951	#REF!	31.0838	20.5073	#REF!	26.9331	21.8601	#REF!	31.9139	24.3812	#REF!	27.3636	22.1368	#REF!	32.8978	24.8271	#REF!	29.3159	24.6118	#REF!	31.96	25.9954	#REF!	32.2829	24.4427
Paramacrobiotus fairbanksi	Madeira	8	1261.94	#REF!	#REF!	81.379	24.0731	17.1783	60.7952	19.4095	16.7254	22.6137	7.06257	#REF!	63.6974	81.7648	#REF!	31.2196	21.8923	#REF!	27.3444	23.8383	#REF!	31.79	23.2679	#REF!	28.5187	22.9827	#REF!	32.4442	27.6631	#REF!	30.6995	25.4823	#REF!	32.1255	25.2474	#REF!	30.8505	25.952
Paramacrobiotus fairbanksi	Madeira	9	963.688	#REF!	#REF!	77.5279	20.9929	14.2249	59.696	16.7376	15.6636	20.9524	6.66667	#REF!	63.5461	82.0061	#REF!	29.5035	21.9858	#REF!	27.2746	22.2087	#REF!	28.8146	26.5856	#REF!	28.7741	20.5674	#REF!	31.0233	26.0588	#REF!	29.8683	22.2695	#REF!	33.921	24.8024	#REF!	30.8409	23.9716
Paramacrobiotus fairbanksi	Madeira	10	979.434	#REF!	#REF!	76.5253	21.4343	14.0606	59.6364	18.3232	16.7475	20.8687	6.90909	#REF!	63.2323	81.596	#REF!	27.8788	25.2525	#REF!	28.0202	22.4444	#REF!	31.2929	24.9899	#REF!	29.0707	24.1818	#REF!	32.6263	25.3333	#REF!	28.2424	23.2323	#REF!	36.303	28.5657	#REF!	33.6364	24
Paramacrobiotus fairbanksi	Madeira	11	1093	#REF!	#REF!	76.038	21.362	14.5712		16.9383	15.3473	16.7443	8.51766	#REF!	60.0504	78.832	#REF!	30.8304	22.1575	#REF!	28.9096	21.168	#REF!	31.2767	26.9499	#REF!	28.1917	22.953	#REF!	30.4424	24.8351	#REF!	29.2976	22.9336	#REF!	34.6333	27.1052	#REF!	31.6841	23.1665
Paramacrobiotus fairbanksi	Madeira	12	1394.86	#REF!	#REF!	77.8104	25.567	17.9964	57.7745	21.8143	17.0664	23.8538	6.37951	#REF!	67.6456	86.6699	#REF!	31.2286	23.8864	#REF!	25.2733	21.8143	#REF!	31.4733	25.5833	#REF!	31.7833	24.7186	#REF!	31.3917	26.2686	#REF!	33.1375	24.3759	#REF!	37.6244	29.4665	#REF!	35.487	26.2196
Paramacrobiotus fairbanksi	Madeira	13	1187.92	#REF!	#REF!	79.1939	25.8563	19.1493	60.7615	20.6309	17.6199	23.2436	6.27688	#REF!	66.7835	84.3237	#REF!	30.8746	21.4434	#REF!	31.1614	24.7252	#REF!	28.931	24.6774	#REF!	31.1614	25.4421	#REF!	31.2729	24.9323	#REF!	29.8869	24.1039	#REF!	31.719	25.0119	#REF!	32.866	24.5977
Paramacrobiotus fairbanksi	Madeira	14	1144.18	#REF!	#REF!	76.0886	21.0284	15.7081	55.402	19.3342	16.6295	21.2959	6.24164	#REF!	67.1422	86.0603	#REF!	28.3697	20.9838	#REF!	24.595	17.9819	#REF!	31.5054	23.8817	#REF!	27.5227	23.213	#REF!	24.4464	20.0773	#REF!	26.8391	24.4018	#REF!	32.5308	26.4527	#REF!	30.8813	23.8223
Paramacrobiotus fairbanksi	Madeira	15	1067.73	#REF!	#REF!	79.8638	23.302	15.2954	58.5128	18.7742	16.9888	20.9829	6.27646	#REF!	62.1756	78.7962	#REF!	31.2166	23.3757	#REF!	27.5538	22.7315	#REF!	29.5601	22.6946	#REF!	27.4986	21.0565	#REF!	30.3147	24.7929	#REF!	29.7626	22.1241	#REF!	34.088	28.4741	#REF!	33.7751	24.4064
Paramacrobiotus fairbanksi	Madeira	16	1313.28	#REF!	#REF!	77.9354	24.8566	18.1256	59.3571	20.4196	17.9596	23.5587	6.48959	#REF!	71.7175	84.2741	#REF!	28.7504	18.4576	#REF!	28.4184	24.1322	#REF!	31.3311	26.23	#REF!	26.4866	22.1853	#REF!	28.5844	24.6302	#REF!	31.15	24.8264	#REF!	34.3797	22.9097	#REF!	32.8101	26.1395
Paramacrobiotus fairbanksi	Madeira	17		#REF!	#REF!									#REF!			#REF!			#REF!			#REF!			#REF!			#REF!			#REF!			#REF!			#REF!
Paramacrobiotus fairbanksi	Madeira	18		#REF!	#REF!									#REF!			#REF!			#REF!			#REF!			#REF!			#REF!			#REF!			#REF!			#REF!
Paramacrobiotus fairbanksi	Madeira	19		#REF!	#REF!									#REF!			#REF!			#REF!			#REF!			#REF!			#REF!			#REF!			#REF!			#REF!
Paramacrobiotus fairbanksi	Madeira	20		#REF!	#REF!									#REF!			#REF!			#REF!			#REF!			#REF!			#REF!			#REF!			#REF!			#REF!
Paramacrobiotus fairbanksi	Madeira	21		#REF!	#REF!									#REF!			#REF!			#REF!			#REF!			#REF!			#REF!			#REF!			#REF!			#REF!
Paramacrobiotus fairbanksi	Madeira	22		#REF!	#REF!									#REF!			#REF!			#REF!			#REF!			#REF!			#REF!			#REF!			#REF!			#REF!
Paramacrobiotus fairbanksi	Madeira	23		#REF!	#REF!									#REF!			#REF!			#REF!			#REF!			#REF!			#REF!			#REF!			#REF!			#REF!
Paramacrobiotus fairbanksi	Madeira	24		#REF!	#REF!									#REF!			#REF!			#REF!			#REF!			#REF!			#REF!			#REF!			#REF!			#REF!
Paramacrobiotus fairbanksi	Madeira	25		#REF!	#REF!									#REF!			#REF!			#REF!			#REF!			#REF!			#REF!			#REF!			#REF!			#REF!
Paramacrobiotus fairbanksi	Madeira	26		#REF!	#REF!									#REF!			#REF!			#REF!			#REF!			#REF!			#REF!			#REF!			#REF!			#REF!
Paramacrobiotus fairbanksi	Madeira	27		#REF!	#REF!									#REF!			#REF!			#REF!			#REF!			#REF!			#REF!			#REF!			#REF!			#REF!
Paramacrobiotus fairbanksi	Madeira	28		#REF!	#REF!									#REF!			#REF!			#REF!			#REF!			#REF!			#REF!			#REF!			#REF!			#REF!
Paramacrobiotus fairbanksi	Madeira	29		#REF!	#REF!									#REF!			#REF!			#REF!			#REF!			#REF!			#REF!			#REF!			#REF!			#REF!
Paramacrobiotus fairbanksi	Madeira	30		#REF!	#REF!									#REF!			#REF!			#REF!			#REF!			#REF!			#REF!			#REF!			#REF!			#REF!

## Sheet: eggs (µm)
Species	Population	egg	Egg bare diameter	Egg full diameter	Process height	Process base width	Process base/height ratio	Terminal disc width	Inter-process distance	Number of processes on the egg circumference
Paramacrobiotus fairbanksi	Madeira	1	80.89	108.54	17.1733	17.8033	1.04032	#REF!	4.28667	13
Paramacrobiotus fairbanksi	Madeira	2	83.41	116.14	15.8867	15.95	1.00665	#REF!	4.35	12
Paramacrobiotus fairbanksi	Madeira	3	79.67	117.7	18.4467	19.2067	1.04254	#REF!	4.76667	12
Paramacrobiotus fairbanksi	Madeira	4	97.61	141.69	22.54	22.2067	0.984366	#REF!	5.27667	14
Paramacrobiotus fairbanksi	Madeira	5	84.37	118.66	16.57	18.0133	1.08787	#REF!	4.34	12
Paramacrobiotus fairbanksi	Madeira	6	78.3	112.72	17.4667	19.76	1.13179	#REF!	4.82333	13
Paramacrobiotus fairbanksi	Madeira	7	75.19	117.14	19.0233	18.99	1.00047	#REF!	4.97667	12
Paramacrobiotus fairbanksi	Madeira	8	90.34	124.62	19.9867	21.6467	1.08347	#REF!	5.25333	11
Paramacrobiotus fairbanksi	Madeira	9	81.87	113.18	17.47	18.7077	1.07776	#REF!	4.15667	13
Paramacrobiotus fairbanksi	Madeira	10	74.88	110.9	14.52	18.0167	1.24158	#REF!	4.43333	12
Paramacrobiotus fairbanksi	Madeira	11	85.37	112.71	14.87	16.7933	1.12919	#REF!	3.93	13
Paramacrobiotus fairbanksi	Madeira	12	86.73	122.24	17.8367	17.4167	0.977433	#REF!	4.89667	11
Paramacrobiotus fairbanksi	Madeira	13	75.17	107.65	16.39	16.41	1.00122	#REF!	3.395	14
Paramacrobiotus fairbanksi	Madeira	14	80.77	118.74	18.02	20.14	1.11476	#REF!	5.25333	12
Paramacrobiotus fairbanksi	Madeira	15	88.76	120.15	18.4433	18.16	0.986049	#REF!	4.20333	12
Paramacrobiotus fairbanksi	Madeira	16						#REF!
Paramacrobiotus fairbanksi	Madeira	17						#REF!
Paramacrobiotus fairbanksi	Madeira	18						#REF!
Paramacrobiotus fairbanksi	Madeira	19						#REF!
Paramacrobiotus fairbanksi	Madeira	20						#REF!
Paramacrobiotus fairbanksi	Madeira	21						#REF!
Paramacrobiotus fairbanksi	Madeira	22						#REF!
Paramacrobiotus fairbanksi	Madeira	23						#REF!
Paramacrobiotus fairbanksi	Madeira	24						#REF!
Paramacrobiotus fairbanksi	Madeira	25						#REF!
Paramacrobiotus fairbanksi	Madeira	26						#REF!
Paramacrobiotus fairbanksi	Madeira	27						#REF!
Paramacrobiotus fairbanksi	Madeira	28						#REF!
Paramacrobiotus fairbanksi	Madeira	29						#REF!
Paramacrobiotus fairbanksi	Madeira	30						#REF!
